# Supplementary material for: Living coccolithophores from the eastern equatorial Indian Ocean during the spring intermonsoon: Indicators of hydrography
Source: Copernicus journal article supplement (doi:10.5194/bg-2017-112), 2017-05-16
Supplement: Supplementary file [file bg-2017-112-RC2-supplement.pdf]

# Living coccolithophores from the eastern equatorial Indian Ocean during the spring intermonsoon: Indicators of hydrography

\*Jun Sun<sup>1,2,3</sup>, Haijiao Liu<sup>1,2,3</sup>, Xiaodong Zhang<sup>2,3</sup>, Cuixia Zhang<sup>2,3</sup>, Shuqun Song<sup>4</sup>

<sup>1</sup> Institute of Marine Science and Technology, Shandong University, 27 Shanda Nan Road, Jinan 250110, PR China

5 <sup>2</sup> Tianjin Key Laboratory of Marine Resources and Chemistry, Tianjin University of Science and Technology, Tianjin 300457, PR China

<sup>3</sup> College of Marine and Environmental Sciences, Tianjin University of Science and Technology, Tianjin 300457, PR China

<sup>4</sup> CAS Key Laboratory of Marine Ecology and Environmental Sciences, Institute of Oceanology, Chinese Academy of Sciences, Qingdao 266071, PR China

10 \*Correspondence to: Jun Sun ([phytoplankton@163.com](mailto:phytoplankton@163.com))

**Abstract.** We studied the biodiversity of autotrophic calcareous coccolithophore assemblages at 30 locations in the eastern equatorial Indian Ocean (EEIO) (80°-94°E, 6°N-5°S) and evaluated the importance of regional hydrology. We found 25 taxa of coccospheres and 17 taxa of coccoliths. The coccolithophore community was dominated by *Gephyrocapsa oceanica*, *Emiliania huxleyi*, *Florisphaera profunda*, *Umbilicosphaera sibogae*, and *Helicosphaera carteri*. The abundance of coccoliths and coccospheres ranged from  $0.192 \times 10^3$  to  $161.709 \times 10^3$  coccoliths l<sup>-1</sup> and  $0.192 \times 10^3$  to  $68.365 \times 10^3$  cells l<sup>-1</sup>, averaged at  $22.658 \times 10^3$  coccoliths l<sup>-1</sup> and  $9.386 \times 10^3$  cells l<sup>-1</sup>, respectively. Biogenic PIC, POC, and rain ratio mean values were  $0.498 \mu\text{gC l}^{-1}$ ,  $1.047 \mu\text{gC l}^{-1}$ , and 0.990 respectively. High abundances of both coccoliths and coccospheres in the surface ocean layer occurred north of the equator. Vertically, the great majority of coccoliths and coccospheres were concentrated in water less than 75 m deep. The ratios between the number of coccospheres and free coccoliths across four transects indicated a pattern that varied among different oceanographic settings. The *H'* and *J* values of coccospheres were similar compared with those of coccoliths. Abundant coccolithophores (along the equator) mainly occurred west of 90°E, which was in accordance with the presence of Wyrтки jets (WJs). *F. profunda* was not found in surface water, indicating a stratified and stable water system. *U. irregularis* dominated in the equatorial zone, suggesting oligotrophic water conditions. Coccosphere distribution was explained by environmental variables, indicated by multi-dimensional scaling (MDS) ordination in response variables and principal components analysis (PCA) ordination in explanatory variables. Coccolithophore distribution was related to temperature, salinity, density and chlorophyll *a*.

## 1 Introduction

The Indian Ocean is the world's third largest ocean basin, and it is strongly influenced by the South Asian monsoon system.

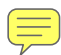

The warm seawater area in the eastern equatorial Indian Ocean (EEIO) is a large region that influences worldwide climatology and El Niño/Southern Oscillation (ENSO) events (Zhang et al., 2009; Peng et al., 2015). The Indian Ocean

dipole is another oceanic phenomenon influencing global oceanographic circulation (Horii et al., 2009). Surface currents in the EEIO are diverse and seasonally dynamic due to monsoon forces. Unlike other ocean basins, the Indian Ocean experiences prevailing semiannual currents (Luyten and Roemmich, 1982; Zhang, 2015). Many currents prevail in the EEIO during the summer and winter monsoon periods. These include the Equatorial undercurrent and the South Java Current (Iskandar, 2009; Peng et al., 2015). There are also currents that exist throughout the year. One example is the Indonesian throughflow (ITF), which is the passageway connecting the Pacific Ocean and Indian Ocean (Ayers et al., 2014). In the spring and fall intermonsoon periods, many surface circulations disappear, and Wyrski jets (WJs) are the only semi-annual currents present at the equator. The equatorial Indian Ocean is controlled by the eastward WJs (also known as Equatorial Jets) (Wang, 2015).

10  Living coccolithophores thrive in the photic water column. Coccolithophores are unicellular microalgal flagellates with diverse life cycles (Moheimani et al., 2012). They generate external calcified scales (coccoliths) responsible for large areas of visible “white water” recorded by satellite remote sensing. Coccolithophores are globally distributed and contribute up to 10% of the global phytoplankton biomass (Holligan et al., 1983; Brown and Yoder, 1994; Gupta et al., 2005; Sadeghi et al., 2012; Hagino and Young, 2015; Oviedo et al., 2015). This calcareous nanoflora usually dominates the open ocean plankton community (O’Brien et al., 2013; Sun et al., 2014). In its dual functions of biomineralization and photoautotrophy, the coccolithophore community influences the global carbon cycle and oceanographic parameters (Sun, 2007). Inorganic calcareous coccoliths can serve as a physical ballast for organic carbon sequestration in the deep ocean (Ziveri et al., 2007; Bolton et al., 2016; Rembauville et al., 2016). As a consequence, the PIC/POC (particulate inorganic carbon to organic carbon = “rain ratio”), is a factor explaining biomineralization process impacts on organic production exports.

20 Coccolithophore assemblages are sensitive to climate variability (Tyrrell, 2008; Silva et al., 2013). Increased CO<sub>2</sub> concentrations combined with other factors (e.g., nutrient elements, pH, irradiance, temperature) stimulated cell organic carbon fixation (photosynthesis) have diminished the rain ratio of coccolithophores (Riebesell et al., 2000; Langer et al., 2009; Shi et al., 2009; Feng et al., 2008). The coccolithophore cell (coccosphere) is surrounded by several thin layers of coccoliths, which are useful in reconstructing paleoceanographic history (Gupta et al., 2005; Guerreiro et al., 2013). Coccolithophore community structure and ecological distributions in the Atlantic Ocean have been documented by McIntyre et al., (1970), Brown and Yoder, (1994), Baumann et al., (1999), Kinkel et al., (2000), and Shutler et al., (2013). Pacific Ocean studies have included Okada and Honjo, (1973, 1975), Honjo and Okada, (1974), Okada and McIntyre, (1977), Houghton and Gupta, (1991), Saavedra-Pellitero, (2011), Saavedra-Pellitero et al., (2014), and López-Fuerte et al., (2015). Most of the coccolithophore studies were limited to surface waters. Studies on coccolithophores in the Indian Ocean have

30 been relatively recent compared to Atlantic and Pacific Ocean studies. Coccolithophore studies in the Indian Ocean mainly include Young (1990), Giraudeau and Bailey (1995), Broerse et al. (2000), Lees (2002), Andrleit (2007), Mohan et al. (2008), Mergulhao et al. (2013), in regard to nanofossil or living species biogeography in the monsoon season. Relatively

few studies have evaluated the occurrence of living coccolithophores in the water column during the intermonsoon period in the eastern Indian Ocean. Our three main objectives were to (1) document the abundance, diversity and geographical patterns of living coccolithophores; (2) explain variations occurring in the nanoflora assemblages; (3) correlate these variations to regional hydrographic parameters.

## 5 **2 Materials and methods**

### **2.1 Survey area and sampling strategy**

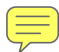

An initial investigation cruise was conducted in the eastern equatorial Indian Ocean (EEIO) (80°~94°E, 6°N~5°S) (Fig. 1) onboard R/V “*Shiyan 1*” from March 10<sup>th</sup> through April 9<sup>th</sup>, 2012. Seawater samples (400-500 mL) and chlorophyll *a* (Chl*a*) samples were collected at seven depths from the surface to 200 m using Niskin bottles on a rosette sampler (Sea-Bird SBE-911 Plus V2). At all the stations, temperature and salinity profile data were determined in situ with the attached sensors system (conductivity-temperature-depth, CTD).

10

### **2.2 Phytoplankton analysis**

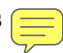

Coccolithophore samples were filtered with a mixed cellulose membrane (25 mm, 0.22 µm) using a Millipore filter system connected to a vacuum pump under < 20 mm Hg filtration pressure. After room temperature drying in plastic Petri dishes, the filters were cut and subsequently mounted on glass slides with neutral balsam for microscope examination (Sun et al., 2014).

15

### **2.3 Size-fractionated Chl*a* analysis**

Chl*a* samples were serially filtered using the same filtration system (vacuum < 200 mm Hg) through 20 µm × 20 mm silk net (micro-class), 2 µm × 20 mm nylon membrane (nano-class) and 0.7 µm × 20 mm Whatman GF/F filters (pico-class). After filtration, Chl*a* membranes were immediately wrapped in aluminum foil and stored in a freezer -20°C freezer. In the laboratory, Chl*a* measurements were made using the fluorescence method of Parsons et al. (1984).

20

### **2.4 Estimation of coccolith calcite, coccosphere carbon biomass**

The cell size biovolume was evaluated from geometric models (Sun and Liu, 2003) and then converted into carbon biomass (POC, particulate organic carbon) using the formula of Eppley et al. and Guo et al. (Eppley et al., 1970; Guo et al., 2016). Determinations of calcite-CaCO<sub>3</sub> (PIC, particulate inorganic carbon) masses were based on *k<sub>s</sub>* values (shape factor) and length maximum (diameter, µm) recorded in previous studies (Young and Ziveri, 2000; Yang and Wei, 2003). The PIC/POC value is a potential rain ratio, which expresses the carbonate flux export to the outside of the euphotic water. As for the irregularly shaped coccolithophores whose biovolume has rare records, nearly 33% of the species were estimated with

25

geometric models using SEM pictures from the literature, websites, and this study (Kleijne, 1991; Giraudeau and Bailey, 1995; Cros and Fortuño, 2002; Young et al., 2003). The website can be visited via the access: <http://ina.tmsoc.org/Nannotax3/index.html>. It is noted that organic carbon was calculated with the exception of *Gladiolithus flabellatus* and *Reticulofenestra sessilis* by the reason of insufficient records in SEM.

## 5 2.5 Multivariate analysis

The spatial distribution of coccolithophores and hydrologic data were analyzed using freeware package Ocean Data View (ODV) 4.7.6 (<https://odv.awi.de/en/>). Box-whisker plots were prepared by the Golden Software Grapher (LLC, Colorado, USA) 10.3.825. Cluster analysis and non-metric multidimensional scaling (Shen et al., 2010) on coccosphere data (after square root transformation) were simultaneously implemented using the program package PRIMER 6.0 (Plymouth Routines In Multivariate Ecological Research, developed at the Plymouth Marine Laboratory, United Kingdom). Prior to the above operations, the raw data were square root transformed. Then, principal component analysis (PCA) considering Euclidean distance was employed after data transformation and normalization. Significance testing was performed using the Analysis of Similarities (ANOSIM) analysis. The Similarity Percentages-Species Contributions the Similarity Percentages Routine (SIMPER) program was used for evaluating the contribution of each species to their sample group. All analyses were conducted to visualize the relations between phytoplankton abundance data and specific environmental factors.

## 3 Results

### 3.1 Hydrographic features

High temperature and highly saline waters from the west equatorial zone were advected into the east equatorial zone (Fig. 2a, b). The temperature-salinity (T-S) curve had an inverted-L-shape (Fig. 2c). During the spring monsoon transition period, the water column was well stratified and quite stable, which is mainly attributed to weak wind-driven surface circulation compared to the monsoon period (vertical temperature and salinity data not shown). Due to the well stratified water column, the spring intermonsoon was considered to be the most oligotrophic period (Rixen et al., 1996).

### 3.2 Taxonomic composition and characteristics

Samples of living coccolithophores from the EEIO during the spring intermonsoon period yielded 26 species, representing 25 taxa of coccospheres and 17 taxa of coccoliths. Scanning electron microscope (SEM) photographs of selected species are shown in Plates I-VI, including several predominant taxa. Among coccolith species, *Gephyrocapsa oceanica*, *Emiliana huxleyi*, *Umbilicosphaera sibogae*, *Helicosphaera carteri*, and *H. hyalina* were most dominant. Coccosphere assemblages were dominated by *G. oceanica*, *Florisphaera profunda*, *E. huxleyi*, *Umbellosphaera irregularis*, and *U. sibogae*. *G. oceanica* was overwhelmingly dominant among the coccoliths, with frequency and relative abundance up to 96.5% and

71.76%, respectively. The rest of coccolith species were similar in frequency and abundance. *G. oceanica* and *E. huxleyi* had high frequencies, with 44.5% and 31%, respectively. *F. profunda* had the highest (up to 40.78%) relative abundance (Fink et al., 2010).

Coccolith and coccosphere density ranged from  $0.192 \times 10^3$  to  $161.709 \times 10^3$  coccoliths  $l^{-1}$  and  $0.192 \times 10^3$  to  $68.365 \times 10^3$  cells  $l^{-1}$ , averaged at  $22.658 \times 10^3$  coccoliths  $l^{-1}$  and  $9.386 \times 10^3$  coccoliths  $l^{-1}$ , respectively. The most predominant coccolith species *G. oceanica* was ranged  $\sim 154.955 \times 10^3$  coccoliths  $l^{-1}$ , with a mean value of  $16.260 \times 10^3$  coccoliths  $l^{-1}$ . And the most predominant coccosphere species was still represented by *G. oceanica*, whose abundance ranged  $\sim 24.805 \times 10^3$  cells  $l^{-1}$ , with average value  $2.458 \times 10^3$  cells  $l^{-1}$ . The abundances of five dominant coccolith and five coccosphere species are shown in Fig. 3. The other dominant coccoliths had similar abundances. For the remaining coccosphere species, *G. oceanica* and *U. irregularis* were more abundant than *E. huxleyi* and *U. sibogae*.

### 3.3 Distribution and diversity pattern

The horizontal distributions of dominant coccoliths and coccospheres are shown in Fig. 4 and Fig. 5. Coccolith abundance was greatest in three regions: south of Sri Lanka, easternmost Sri Lanka, and southernmost area (Fig. 4). Abundance was relatively low in the equatorial region. In contrast to the coccoliths, coccospheres were more homogeneous in their horizontal distributions (Fig. 5).

Dominant coccolithophores abundances along two sections are illustrated in Figs. 6-9. More abundant coccolith species were restricted to the water column west of  $90^\circ E$  (Fig. 6). Nearly no coccoliths were distributed from the surface down to 50 m along east of  $90^\circ E$ . Dominant coccospheres abundance in section A were mainly represented by *F. profunda* and *U. irregularis* (Fig. 7). These two taxa followed trends similar to the coccoliths. For section B, coccolith abundance was primarily due to *G. oceanica* (Fig. 8) and abundance was concentrated in the easternmost region. *E. huxleyi* and *U. sibogae* were mainly distributed in deeper water. *H. hyalina* abundance decreased in deeper and open water and *H. carteri* showed a plaque pattern. Fig. 9 shows obvious coccosphere abundance in the 75 m water layer of section B, where a deep abundance maximum was located. *F. profunda* was the dominant coccosphere in the assemblage at section B.

Vertically, numerous dominant coccoliths were confined to the middle layer in the EEIO (Fig. 10). The others reached peak values at the 50 m water layer, except for *E. huxleyi* and *H. carteri*, whose peak values were located in the 200 m and 100 m water layers. Coccosphere species increased from the surface towards the middle water, and then decreased towards the bottom water (Fig. 11). The ratios between coccospheres and free coccoliths were charted along transects (Fig. 12). The ratio values basically coincided with coccosphere abundance. The ratio reached a maximum in the 40 m layer along sections A and C. The ratio along section B exhibited a differed trend and its maximum was at the surface layer. The section D ratio was concurrent with the section C ratio.

### 3.4 Estimation of PIC, POC, and rain ratios

The mean PIC, POC, and rain ratios were 0.498  $\mu\text{gC l}^{-1}$ , 1.047  $\mu\text{gC l}^{-1}$ , and 0.990, respectively. The surface distributions and depth-integrated patterns of PIC, POC, and rain ratio are shown in Fig. 13. We found a dominance of *Oolithotus fragilis* and *G. oceanica* in biogenic PIC. Unlike PIC, POC was mainly contributed by cells of *U. sibogae* and *U. irregularis*. The pattern of PIC and POC appeared to be similar. The surface water of the inner and outer of Sri Lanka section displayed two peaks.

5 In the case of the integral value, PIC and POC were preferentially distributed west of the equator. The depth averaged-rain ratio peak occurred at 80°E-85°E.

In section A, *O. fragilis* contributed about 48% of total PIC, with a maximum value at Station (St.) I405 accounting for 94%. The POC distribution pattern was similar to *U. irregularis* abundance. The maximum rain ratio value occurred east of the equator. In section B, PIC was represented by *F. profunda*. POC and cell abundance showed concurrent trends. Rain ratio  
10 had a clear pattern with higher values in the surface and bottom layers.

### 3.5 Cocosphere clustering and analysis

Cocosphere samples at 75 m layer (Deep Chlorophyll Maximum, DCM), where great quantities of cocosphere located, were chosen for the cluster and MDS analysis. The combinations of clustering technique and MDS method are usually  
15 conductive to obtain balanced and reliable conclusions in ecological studies (Liu, 2015; Clarke and Warwick, 2001). All samples could be clustered into four groups (Group a, b, c, d). MDS stress values (0.15) lesser than 0.2 give an useful ordination picture, particularly at the lower end of this range (Cox and Cox, 1992; Clarke and Warwick, 2001). ANOSIM analysis revealed remarkable difference (Global R=0.85, p=0.001) among group classification with the exception of Group b-d and Group c-d whose R value < p value (Fink et al., 2010). It is accepted that Global R value larger than 0.5 accounts for significant difference among groups (Liao, 2013). Apparently, localities were basically classified along transects (e.g. Group  
20 c included the equatorial localities), whereas some exceptions existed (Fig. 14). Besides, MDS bubble plots for first six dominant cocosphere species were presented in Fig. 14. It is apparently that, Group a and b were mainly composed by dominant cocosphere *G. oceanica*, *F. profunda* and *E. huxleyi*. While Group c was primarily contributed by species *U. sibogae* and *U. irregularis*. Considering Group d only contained two localities, *G. oceanica* dominated the whole group. The SIMPER results were shown in Table 4. It showed the contribution rates of dominant cocosphere in each group.

## 25 4 Discussion

### 4.1 Coccolithophore species diversity and distributions in the EEIO

The surface water of eastern Sri Lanka had the greatest coccolith and cocosphere species richness and abundance. The biodiversity indices were much lower around the neighboring waters of Sri Lanka (Fig. 15), suggesting that the local water  
30 in that system lacked ecosystem stability. The  $H'$  and  $J$  cocospheres values were slightly higher compared with coccolith values (Fig. 16). Therefore, cocosphere aggregations exhibited more diversity than coccoliths. This finding was consistent

with that of Gupta et al. (2005). The physical distributions of coccolithophore assemblages in relation to the temperature-salinity are also shown (Figs. 17, 18). The coccoliths represented by *G. oceanica*, *U. sibogae*, *H. carteri* and *H. hyalina* were concentrated in the surface layer characterized by high temperature and low salinity and the bottom euphotic layer characterized by low temperature and high salinity. Conversely, *E. huxleyi* was predominantly distributed in the intermediate layer with moderate temperature and salinity. The coccospheres, *F. profunda* and *E. huxleyi* were mainly found in the deeper euphotic layer where the DCM layer is located. *U. irregularis* and *U. sibogae* had greater abundances in the surface layer, confirming their preference for oligotrophic conditions.

The POC pattern can be represented by coccosphere abundance. Varied allocation to calcification produced dissimilarities in the PIC/POC ratios. Large rain ratio values around the Sri Lanka waters predicted a mineral ballast with a drawdown of biological carbon towards the deep seafloor (Iglesias-Rodriguez et al., 2008; Findlay et al., 2011). We suggest that the rain ratio (Zondervan et al., 2002) is of great importance in predicting biomineralization and photosynthetic production (Bolton et al., 2016).

#### 4.2 Coccolithophore ecological preferences

Many coccolithophore indicator species were collected in this study although several were uncommon. *G. oceanica* is a representative dominant species that shows preference for eutrophic water (Andruleit et al., 2000). In the surface distribution of *G. oceanica*, both coccoliths and coccospheres were predominantly distributed in the easternmost waters of Sri Lanka. This may be due to the nutrients derived from the Andaman Sea. The coccosphere of *U. irregularis* was only common in the equatorial zone, indicating oligotrophic water conditions there (Kleijne et al., 1989). In the Indian Ocean, eight species of *Florisphaera* were discovered in deep water (Kahn and Aubry, 2012). We found only one species of *Florisphaera* (*F. profunda*) and it occurred in the disphotic layer below 100 m. As an inhabitant of deep water, *F. profunda* was not found in surface water layer, indicating a stratified and stable water system. The cosmopolitan taxa, *Calcidiscus leptoporus*, was detected and its coccoliths peaked at a depth of 200 m at St. I705. *C. leptoporus* is sparsely distributed in the water column, whereas it predominates in the coccolithophore flora of the sediment owing to its resistance to disintegration (Renaud et al., 2002). The ratios between the number of coccospheres and free coccoliths across four transects were separately demonstrated and the vertical distribution patterns were variable. This level of biogeographic variation might be related to regional hydrographic features. We presumed that coccospheres disintegrated into coccoliths after sinking for a certain distance at section B. Different circumstances appeared at section A, where a subsurface coccosphere maximum at the 40 m layer occurred. This finding coincided with the pattern of biological abundance. Ratios in sections C and D were consistent with ratios observed in the equator section (Monechi et al., 2000).

#### 4.3 Factors regulating coccolithophore assemblage structure

Coccolithophore abundance was relatively low during the low wind transition period compared to previous studies conducted during the monsoon period in the EEIO. The low abundance is due to the gentle winds and low nutrient availability during the spring intermonsoon season leading to low primary productivity and biomass in the EEIO (Morrison et al., 1998). The surface coccolithophores were most abundant in the northeastern area where pockets of low-salinity water plume occur (Fig. 2). This resulted from the inflow of less saline water into the equatorial Indian Ocean from the Bay of the Bengal and Andaman Seas (Wyrтки, 1961; LaViolette, 1967). The outflows derived from the surface water of the Andaman Sea become concentrated between the south Nicobar Islands and Sumatra (Rizal et al., 2012). In contrast, a highly saline water tongue was observed along the equatorial Indian Ocean (west of 90°E), indicating that Wyrтки jets (WJs) prevailed during the spring intermonsoon period. There was consistency in the nanofloral distribution pattern at the equator (section A, Figs. 6, 7). The maximum abundance along west of 90°E was probably caused by inflow from WJs considering their ability to alter the oceanic layer structure. PCA was carried out to examine the relationships among the environmental variables (Fig. 19). Coccolithophore abundance was driven primarily by temperature, salinity, density and Chla. The cluster of environmental data from sample locations coincided with the grouping of species data (except for a few isolated points). The most abundant species is shown above each locality symbol. The first three principal components (PC1, PC2, PC3) were extracted based on eigenvalues larger than 1 and explain 42%, 24%, and 20.2% of the variation, respectively. The cumulative variances of the three components reached up to 86.2% (PC3 not shown). The eigenvectors of all five principal components are shown in Table 5. The results of PCA indicated that salinity, density, and pico-Chla had a positive relation with PC1, whereas a close correlation occurred in Group B that was dominated by *E. huxleyi* and *G. oceanica*. Similarly, temperature, Chla, micro-Chla and nano-Chla were positively correlated to PC2. Groups C and D, characterized by *U. irregularis*, were associated with temperature. The majority of localities in Group A (represented by *F. profunda*) were negatively related to Chla and size-fractionated Chla. Finally, the MDS ordination of coccosphere abundance and the PCA ordination of environmental variables are in good agreement. This high degree of matching in our study confirmed that the present explanatory variables (Tezel and Hasırcı, 2013) are appropriate for explaining the biological response variables.

## 5 Conclusions

The coccolithophore assemblage in the EEIO during the spring intermonsoon season was primarily comprised of the coccoliths *G. oceanica*, *E. huxleyi*, *U. sibogae*, *H. carteri*, and *H. hyalina* and the coccospheres *G. oceanica*, *F. profunda*, *E. huxleyi*, *U. irregularis*, and *U. sibogaes*. The abundance of coccoliths and coccospheres ranged from  $0.192 \times 10^3 \sim 161.709 \times 10^3$  coccoliths  $l^{-1}$  and  $0.192 \times 10^3 \sim 68.365 \times 10^3$  cells  $l^{-1}$ , with an average value of  $22.658 \times 10^3$  coccoliths  $l^{-1}$  and  $9.386 \times 10^3$  cells  $l^{-1}$ , respectively. The mean values of biogenic PIC, POC, and the rain ratio were  $0.498 \mu\text{g C } l^{-1}$ ,  $1.047 \mu\text{g C } l^{-1}$ , and 0.990, respectively. The rain ratio was considered to be of great importance so relative biovolume and carbon biomass



were calculated. Additional studies using direct chemical treatments on coccoliths and coccospheres might establish a relationship between biovolume conversion and chemical measurements and provide more accurate data.

The localities and coccosphere species were ordered by MDS and all samples were clustered into four groups in the EEIO.

The coccolithophore abundance in this study was relatively low and resulting from the weak winds and minimal nutrient

upwelling compared to previous studies that were conducted during the summer or winter monsoon seasons. During the

spring intermonsoon period, no significant oceanic circulation occurred in the EEIO except for WJs. We inferred that, in the

study area, different coccolithophore species had specific environmental preferences. Thus, coccolithophore species are good

indicators of oceanographic changes. PCA was used to study the correlation among environmental variables, indicating

positive or negative relationships with nanofloral species. Coccosphere distribution was highly correlated to specific

environmental variables. This was shown by the MDS ordination of response variables and PCA ordination of explanatory

variables. Coccolithophores can be used as dynamic indicators of the upper ocean for their sensitivity to environmental

changes. Obtaining knowledge of specific cellular physiological behavior related to global change variables will be a future

challenge. We attempted to evaluate coccolithophore POC contents using a carbon-volume model that was subject to a

degree of error. Future planned studies will involve indoor experiments using axenic cultures of coccolithophores. The cell

POC will be measured using advanced chemical techniques. Carbon evaluation of the field community will then be

compared with direct measurements from controlled laboratory experiments.

*Acknowledgements.* We wish to thank the Dr. Dongxiao Wang and Dr. Yunkai He for providing and processing CTD dataset. Dr. Ying

Wang, Bing Xue and Xiaoqian Li were also appreciated for their constructive comments on the paperwork. This work was supported by

the Natural Science Foundation of China (41276124) and National Basic Research Program of China (2015CB954002), Science Fund for

University Creative Research Groups in Tianjin (TD12-5003), and the Program for Changjiang Scholars to Jun Sun. It was also partly

supported by the Natural Science Foundation of China (41676112, 41306119, 41306118). The Captain and Crews of R/V *Shiyan1* were

acknowledged for their assistance in sample collection during the cruise, and the Open Cruises from the Natural Science Foundation of

China. We also We thank LetPub ([www.letpub.com](http://www.letpub.com)) for its linguistic assistance during the preparation of this manuscript.

## References

Andruleit, H.: Status of the Java upwelling area (Indian Ocean) during the oligotrophic northern hemisphere winter monsoon season as revealed by coccolithophores, *Mar. Micropaleontol.*, 64, 36-51, doi:10.1016/j.marmicro.2007.02.001, 2007.

Andruleit, H. A., von Rad, U., Brans, A., and Ittekkot, V.: Coccolithophore fluxes from sediment traps in the northeastern Arabian Sea off Pakistan, *Mar. Micropaleontol.*, 38, 285-308, doi: 10.1016/s0377-8398(00)00007-4, 2000.

Ayers, J. M., Strutton, P. G., Coles, V. J., Hood, R. R., and Matear, R. J.: Indonesian throughflow nutrient fluxes and their potential impact on Indian Ocean productivity, *Geophys. Res. Lett.*, 41, 5060-5067, doi: 10.1002/2014GL060593, 2014.

Bolton, C. T., Hernández-Sánchez, M. T., Fuertes, M.-Á., González-Lemos, S., Abrevaya, L., Mendez-Vicente, A., Flores, J.-A., Probert, I., Giosan, L., and Johnson, J.: Decrease in coccolithophore calcification and CO<sub>2</sub> since the middle Miocene, *Nat. Commun.*, 7, doi: 10.1038/ncomms10284, 2016.

Broerse, A., Brummer, G.-J., and Van Hinte, J.: Coccolithophore export production in response to monsoonal upwelling off

- Somalia (northwestern Indian Ocean), *Deep-Sea Res. Pt. II: Topical Studies in Oceanography*, 47, 2179-2205, 2000.
- Brown, C., and Yoder, J.: Distribution pattern of coccolithophorid blooms in the western North Atlantic Ocean, *Cont. Shelf Res.*, 14, 175-197, 1994.
- Clarke, K. R., and Warwick, R.M.: *Change in marine communities: an approach to statistical analysis and interpretation*, Plymouth, UK: Primer E, 2001.
- Cox, M. A., and Cox, T.: Interpretation of Stress in non-metric multidimensional scaling, *Statistica Applicata*, 4, 611-618, 1992.
- Cros, L., and Fortuño, J. M.: Atlas of northwestern Mediterranean coccolithophores, *Sci. Mar.*, 66, 1-182, 2002.
- Eppley, R. W., Reid, F., and Strickland, J.: Estimates of phytoplankton crop size, growth rate, and primary production, *Calif. Univ. Scripps Inst. Oceanogr. Bull.*, 1970.
- Feng, Y., Warner, M. E., Zhang, Y., Sun, J., Fu, F.-X., Rose, J. M., and Hutchins, D. A.: Interactive effects of increased pCO<sub>2</sub>, temperature and irradiance on the marine coccolithophore *Emiliania huxleyi* (Prymnesiophyceae), *Eur. J. Phycol.*, 43, 87-98, doi: 10.1080/09670260701664674, 2008.
- Findlay, H. S., Calosi, P., and Crawford, K.: Determinants of the PIC: POC response in the coccolithophore *Emiliania huxleyi* under future ocean acidification scenarios, *Limnol. and Oceanogr.*, 56, 1168-1178, doi:10.4319/lo.2011.56.3.1168, 2011.
- Fink, C., Baumann, K.-H., Groeneveld, J., and Steinke, S.: Strontium/Calcium ratio, carbon and oxygen stable isotopes in coccolith carbonate from different grain-size fractions in South Atlantic surface sediments, *Geobios*, 43, 151-164, 10.1016/j.geobios.2009.11.001, 2010.
- Giraudeau, J., and Bailey, G. W.: Spatial dynamics of coccolithophore communities during an upwelling event in the Southern Benguela system, *Cont. Shelf Res.*, 15, 1825-1852, doi:10.1016/0278-4343(94)00095-5, 1995.
- Guerreiro, C., Oliveira, A., De Stigter, H., Cachão, M., Sá, C., Borges, C., Cros, L., Santos, A., Fortuño, J.-M., and Rodrigues, A.: Late winter coccolithophore bloom off central Portugal in response to river discharge and upwelling, *Cont. Shelf Res.*, 59, 65-83, doi: 10.1016/j.csr.2013.04.016, 2013.
- Guo, S., Sun, J., Zhao, Q., Feng, Y., Huang, D., and Liu, S.: Sinking rates of phytoplankton in the Changjiang (Yangtze River) estuary: A comparative study between *Prorocentrum dentatum* and *Skeletonema dornhii* bloom, *J. Marine Syst.*, 154, 5-14, doi: 10.1016/j.jmarsys.2015.07.003, 2016.
- Guptha, M. V. S., Mergulhao, L. P., Murty, V. S. N., and Shenoy, D. M.: Living coccolithophores during the northeast monsoon from the Equatorial Indian Ocean: Implications on hydrography, *Deep-Sea Res. Pt II*, 52, 2048-2060, doi:10.1016/j.dsr2.2005.05.010, 2005.
- Hagino, K., and Young, J. R.: *Biology and Paleontology of Coccolithophores (Haptophytes)*, in: *Marine Protists*, Springer, 311-330, 2015.
- Holligan, P., Viollier, M., Harbour, D., Camus, P., and Champagne-Philippe, M.: Satellite and ship studies of coccolithophore production along a continental shelf edge, *Nature*, 304, 339-342, doi:10.1038/304339a0, 1983.
- Horii, T., Masumoto, Y., Ueki, I., Hase, H., and Mizuno, K.: Mixed layer temperature balance in the eastern Indian Ocean during the 2006 Indian Ocean dipole, *J. Geophys. Res.: Oceans*, 114, doi:10.1029/2008JC005180, 2009.
- Houghton, S. D., and Guptha, M. S.: Monsoonal and fertility controls on recent marginal sea and continental shelf coccolith assemblages from the western Pacific and northern Indian oceans, *Mar. Geol.*, 97, 251-259, doi:10.1016/0025-3227(91)90119-O, 1991.
- Iglesias-Rodriguez, M. D., Halloran, P. R., Rickaby, R. E., Hall, I. R., Colmenero-Hidalgo, E., Gittins, J. R., Green, D. R., Tyrrell, T., Gibbs, S. J., and von Dassow, P.: Phytoplankton calcification in a high-CO<sub>2</sub> world, *Science*, 320, 336-340, doi: 10.1126/science.1154122, 2008.
- Iskandar I, Masumoto Y, and Mizuno K.: Subsurface equatorial zonal current in the eastern Indian Ocean, *J. Geophys. Res.*, 114, 1-12, doi: 10.1029/2008JC005188, 2009.
- Kahn, A., and Aubry, M.-P.: New species of the coccolithophore *Florisphaera* Okada and Honjo 1973, *Micropaleontology*, 58, 209-215, 2012.
- Kinkel, H., Baumann, K.-H., and Cepek, M.: Coccolithophores in the equatorial Atlantic Ocean: response to seasonal and

- Late Quaternary surface water variability, *Mar. Micropaleontol.*, 39, 87-112, doi:10.1016/S0377-8398(00)00016-5, 2000.
- Kleijne, A., Kroon, D., and Zevenboom, W.: Phytoplankton and foraminiferal frequencies in northern Indian Ocean and Red Sea surface waters, *Neth. J. Sea Res.*, 24, 531-539, doi:10.1016/0077-7579(89)90131-2, 1989.
- Kleijne, A.: Holococcolithophorids from the Indian Ocean, Red Sea, Mediterranean Sea and North Atlantic Ocean, *Mar. Micropaleontol.*, 17, 1-76, doi:10.1016/0377-8398(91)90023-Y, 1991.
- López-Fuerte, F. O., Gárate-Lizárraga, I., Siqueiros-Beltrones, D. A., and Yabur, R.: First record and geographic range extension of the coccolithophore *Scyphosphaera apsteinii* Lohman, 1902 (Haptophyta: Pontosphaeraceae) from the Pacific coast of Mexico, *Check List*, 11, 1754, doi: <http://dx.doi.org/10.15560/11.5.1754>, 2015.
- Langer, G., Nehrke, G., Probert, I., Ly, J., and Ziveri, P.: Strain-specific responses of *Emiliania huxleyi* to changing seawater carbonate chemistry, *Biogeosciences*, 6, 2637-2646, doi:10.5194/bg-6-2637-2009, 2009.
- LaViolette, P. E.: Temperature, salinity, and density of the world's seas: Bay of Bengal and Andaman Sea, DTIC Document, 1967.
- Lees, J. A.: Calcareous nannofossil biogeography illustrates palaeoclimate change in the Late Cretaceous Indian Ocean, *Cretaceous Res.*, 23, 537-634, doi:10.1006/cres.2003.1021, 2002.
- Liao, X. L., Chen, P. M., Ma, S. W., Chen, H. G.: Community structure of phytoplankton and its relationship with environmental factors before and after construction of artificial reefs in Yangmeikeng, Daya Bay, South China Fisheries Science, 9, 109-119, doi: 10.3969/j.issn.2095-0780.2013.05.017, 2013.
- Liu, H. J., Sun, J., Feng, Y. Y.: Study on modern coccolithophores in coastal region along the east Hainan Island, *Haiyang Xuebao*, 37, 27-40, doi: 10.3969/j.issn.0253-4193.2015.12.004, 2015.
- Luyten, J. R., and Roemmich, D. H.: Equatorial currents at semi-annual period in the Indian Ocean, *J. Phys. Oceanogr.*, 12, 406-413, doi: [http://dx.doi.org/10.1175/1520-0485\(1982\)012<0406:ECASAP>2.0.CO;2](http://dx.doi.org/10.1175/1520-0485(1982)012<0406:ECASAP>2.0.CO;2) 1982.
- McIntyre, A., Bé, A., and Roche, M.: Modern Pacific Coccolithophorida: a paleontological thermometer, *Transactions of the New York Academy of Sciences*, 32, 720, doi: 10.1111/j.2164-0947.1970.tb02746.x, 1970.
- Mergulhao, L. P., Guptha, M., Unger, D., and Murty, V.: Seasonality and variability of coccolithophore fluxes in response to diverse oceanographic regimes in the Bay of Bengal: Sediment trap results, *Palaeogeography, Palaeoclimatology, Palaeoecology*, 371, 119-135, doi: <http://dx.doi.org/10.1016/j.palaeo.2012.12.024>, 2013.
- Mohan, R., Mergulhao, L. P., Guptha, M., Rajakumar, A., Thamban, M., AnilKumar, N., Sudhakar, M., and Ravindra, R.: Ecology of coccolithophores in the Indian sector of the Southern Ocean, *Mar. Micropaleontol.*, 67, 30-45, doi:10.1016/j.marmicro.2007.08.005, 2008.
- Moheimani, N. R., Webb, J. P., and Borowitzka, M. A.: Bioremediation and other potential applications of coccolithophorid algae: A review, *Algal Res.*, 1, 120-133, doi:10.1016/j.algal.2012.06.002, 2012.
- Monechi, S., Buccianti, A., and Gardin, S.: Biotic signals from nanoflora across the iridium anomaly in the upper Eocene of the Massignano section: evidence from statistical analysis, *Mar. Micropaleontol.*, 39, 219-237, 2000.
- Morrison, J., Codispoti, L., Gaurin, S., Jones, B., Manghnani, V., and Zheng, Z.: Seasonal variation of hydrographic and nutrient fields during the US JGOFS Arabian Sea Process Study, *Deep-Sea Res. Pt II: Topical Studies in Oceanography*, 45, 2053-2101, doi:10.1016/S0967-0645(98)00063-0, 1998.
- O'Brien, C., Peloquin, J., Vogt, M., Heinle, M., Gruber, N., Ajani, P., Andrleit, H., Arístegui, J., Beaufort, L., and Estrada, M.: Global marine plankton functional type biomass distributions: coccolithophores, *Earth Sys. Sci. Data Discuss*, 5, 491-520, doi:10.1594/PANGAEA.785092, 2013.
- Okada, H., and Honjo, S.: The distribution of oceanic coccolithophorids in the Pacific, *Deep-Sea Res.*, 1973, 355-374, Okada, H., and Honjo, S.: Distribution of coccolithophores in marginal seas along the western Pacific Ocean and in the Red Sea, *Mar. Biol.*, 31, 271-285, doi: 10.1007/BF00387154, 1975.
- Okada, H., and McIntyre, A.: Modern coccolithophores of the Pacific and North Atlantic oceans, *Micropaleontology*, 23, 1-55, doi: 10.2307/1485309, 1977.
- Oviedo, A., Ziveri, P., Álvarez, M., and Tanhua, T.: Is coccolithophore distribution in the Mediterranean Sea related to seawater carbonate chemistry?, *Ocean Sci.*, 11, 13-32, doi:10.5194/os-11-13-2015, 2015.
- Peng, S., Qian, Y.-K., Lumpkin, R., Du, Y., Wang, D., and Li, P.: Characteristics of the Near-Surface Currents in the Indian

- Ocean as Deduced from Satellite-Tracked Surface Drifters. Part I: Pseudo- Eulerian Statistics, *J.Phys. Oceanogr.*, 45, 441-458, doi: 10.1175/jpo-d-14-0050.1, 2015.
- Rembauville, M., Meilland, J., Ziveri, P., Schiebel, R., Blain, S., and Salter, I.: Planktic foraminifer and coccolith contribution to carbonate export fluxes over the central Kerguelen Plateau, *Deep-Sea Res. Pt I: Oceanographic Research Papers*, 111, 91-101, doi: <http://dx.doi.org/10.1016/j.dsr.2016.02.017>, 2016.
- 5 Renaud, S., Ziveri, P., and Broerse, A. T.: Geographical and seasonal differences in morphology and dynamics of the coccolithophore *Calcidiscus leptoporus*, *Mar. Micropaleontol.*, 46, 363-385, doi:10.1016/S0377-8398(02)00081-6, 2002.
- Riebesell, U., Zondervan, I., Rost, B., Tortell, P. D., Zeebe, R. E., and Morel, F. M.: Reduced calcification of marine plankton in response to increased atmospheric CO<sub>2</sub>, *Nature*, 407, 364-367, doi:10.1038/35030078, 2000.
- 10 Rixen, T., Haake, B., Ittekkot, V., Guptha, M., Nair, R., and Schlüssel, P.: Coupling between SW monsoon-related surface and deep ocean processes as discerned from continuous particle flux measurements and correlated satellite data, *J. Geophys. Res.: Oceans*, 101, 28569-28582, doi: 10.1029/96JC02420, 1996.
- Rizal, S., Damm, P., Wahid, M. A., Sundermann, J., Ilhamsyah, Y., and Iskandar, T.: General circulation in the Malacca Strait and Andaman Sea: a numerical model study, *Am. J. Environ. Sci.*, 8, 479, doi:10.3844/ajessp.2012.479.488, 2012.
- 15 Saavedra-Pellitero, M., Baumann, K.-H., Flores, J.-A., and Gersonde, R.: Biogeographic distribution of living coccolithophores in the Pacific sector of the Southern Ocean, *Mar. Micropaleontol.*, 109, 1-20, doi: <http://dx.doi.org/10.1016/j.marmicro.2014.03.003>, 2014.
- Saavedra - Pellitero, M., Flores, J., Lamy, F., Sierro, F., and Cortina, A.: Coccolithophore estimates of paleotemperature and paleoproductivity changes in the southeast Pacific over the past~ 27 kyr, *Paleoceanography*, 26, 1-16, doi:10.1029/2009PA001824, 2011.
- 20 Sadeghi, A., Dinter, T., Vountas, M., Taylor, B., Altenburg-Soppa, M., and Bracher, A.: Remote sensing of coccolithophore blooms in selected oceanic regions using the PhytoDOAS method applied to hyper-spectral satellite data, *Biogeosciences*, 9, 2127-2143, doi:10.5194/bg-9-2127-2012, 2012.
- Shen, P. P., Tan, Y. H., Huang, L. M., Zhang, J. L., and Yin, J. Q.: Occurrence of brackish water phytoplankton species at a closed coral reef in Nansha Islands, South China Sea, *Mar. pollut. Bull.*, 60, 1718-1725, 10.1016/j.marpolbul.2010.06.028, 2010.
- 25 Shi, D., Xu, Y., and Morel, F.: Effects of the pH/pCO<sub>2</sub> control method on medium chemistry and phytoplankton growth, *Biogeosciences*, 6, 1199-1207, doi:10.5194/bg-6-1199-2009, 2009.
- Shutler, J., Land, P., Brown, C., Findlay, H., Donlon, C., Medland, M., Snooke, R., and Blackford, J.: Coccolithophore surface distributions in the North Atlantic and their modulation of the air-sea flux of CO<sub>2</sub> from 10 years of satellite Earth observation data, *Biogeosciences*, 10, 2699-2709, doi:10.5194/bg-10-2699-2013, 2013.
- 30 Silva, A., Brotas, V., Valente, A., Sá, C., Diniz, T., Patarra, R. F., Álvaro, N. V., and Neto, A. I.: Coccolithophore species as indicators of surface oceanographic conditions in the vicinity of Azores islands, *Estuar. Coast.Shelf S.*, 118, 50-59, doi: <http://dx.doi.org/10.1016/j.ecss.2012.12.010>, 2013.
- 35 Sun, J., and Liu, D.: Geometric models for calculating cell biovolume and surface area for phytoplankton, *J. Plankton Res.*, 25, 1331-1346, doi: 10.1093/plankt/fbg096, 2003.
- Sun, J.: Organic carbon pump and carbonate counter pump of living coccolithophorid, *Advances in Earth Science*, 22, 1231-1239, 2007.
- 40 Sun, J., Gu, X. Y., Feng, Y. Y., Jin, S. F., Jiang, W. S., Jin, H. Y., and Chen, J. F.: Summer and winter living coccolithophores in the Yellow Sea and the East China Sea, *Biogeosciences*, 11, 779-806, doi:10.5194/bg-11-779-2014, 2014.
- Tezel, E. E., and Hasırcı, S.: The relationship between environmental variables and the vertical and horizontal assemblages of phytoplankton in Erfelek Reservoir in Sinop, Turkey, *Fundam. Appl. Limnol.*, 183, 177-188, 2013.
- Tyrrell, T.: Calcium carbonate cycling in future oceans and its influence on future climates, *J. Plankton Res.*, 30, 141-156, doi:10.1093/plankt/fbm105, 2008.
- 45 Wang, Y., and Cui, F. J.: The structure and seasonal variation of upper-layer currents at central equatorial indian ocean, *Oceanologia et Limnologia Sinica*, 46, 241-247, doi: 10.11693/hyhz20140500128, 2015.
- Wyrтки, K.: Physical oceanography of the southeast Asian waters, Scripps Institution of Oceanography, 1961.

- Yang, T., and Wei, K.: How many coccoliths are there in a coccosphere of the extant coccolithophorids? A compilation, *Journal of Nannoplankton Research*, 25, 7-15, 2003.
- Young, J.: Size variation of Neogene Reticulofenestra coccoliths from Indian Ocean DSDP Cores, *J. Micropalaeontol.*, 9, 71-86, doi: 10.1144/jm.9.1.71 1990.
- 5 Young, J., Geisen, M., Cros, L., Kleijne, A., Sprengel, C., Probert, I., and Ostergaard, J.: A guide to extant coccolithophore taxonomy, *Journal of Nannoplankton Research*, Special Issue 1, 2003.
- Young, J. R., and Ziveri, P.: Calculation of coccolith volume and its use in calibration of carbonate flux estimates, *Deep-Sea Res. Pt II: Topical studies in oceanography*, 47, 1679-1700, doi:10.1016/S0967-0645(00)00003-5, 2000.
- 10 Zhang, Q., Hou, Y., Qi, Q., and Bai, X.: Variations in the eastern Indian Ocean warm pool and its relation to the dipole in the tropical Indian Ocean, *Chinese Journal of Oceanology and Limnology*, 27, 640-649, doi: 10.1007/s00343-009-9148-5, 2009.
- Zhang, Y., Du Y., Zhang, Y. H., Yang, Y. L.: Asymmetric influences of positive and negative IOD events on salinity transport by the fall Wyrtki Jet along the equatorial Indian Ocean, *Journal of Tropical Oceanography*, 34, 1-10, doi: 10.11978/2014141, 2015.
- 15 Ziveri, P., de Bernardi, B., Baumann, K.-H., Stoll, H. M., and Mortyn, P. G.: Sinking of coccolith carbonate and potential contribution to organic carbon ballasting in the deep ocean, *Deep-Sea Res. Pt. II: Topical Studies in Oceanography*, 54, 659-675, doi:10.1016/j.dsr2.2007.01.006, 2007.
- Zondervan, I., Rost, B., and Riebesell, U.: Effect of CO<sub>2</sub> concentration on the PIC/POC ratio in the coccolithophore *Emiliana huxleyi* grown under light-limiting conditions and different daylengths, *J. Exp. Mar. Biol. and Ecol.*, 272, 55-70, 2002.
- 20

Table legends:

Table 1 Living coccolithophores composition in the eastern equatorial Indian Ocean during spring intermonsoon period of 2012.

Table 2 Predominant species abundance in the eastern equatorial Indian Ocean during spring intermonsoon period of 2012.

Table 3 Global test by ANOSIM analysis in coccosphere species matrix.

Table 4 Dominant coccosphere species and their contribution to each group revealed by means of SIMPER analysis.

Table 5 The statistical values by PCA analysis in coccosphere species matrix.

Table 1 Living coccolithophores composition in the eastern equatorial Indian Ocean during spring intermonsoon period of 2012.

| Species                           | Frequency of occurrence (%fi) | Relative abundance(%P) | Dominance degree(Y) |
|-----------------------------------|-------------------------------|------------------------|---------------------|
| Dominant coccoliths               |                               |                        |                     |
| <i>Gephyrocapsa oceanica</i>      | 96.5                          | 71.76                  | 0.6925              |
| <i>Emiliana huxleyi</i>           | 64.0                          | 8.00                   | 0.0512              |
| <i>Umbilicosphaera sibogae</i>    | 62.5                          | 6.26                   | 0.0391              |
| <i>Helicosphaera carteri</i>      | 63.5                          | 3.50                   | 0.0222              |
| <i>Helicosphaera hyalina</i>      | 61.5                          | 3.02                   | 0.0186              |
| Dominant coccospheres             |                               |                        |                     |
| <i>Gephyrocapsa oceanica</i>      | 44.5                          | 26.18                  | 0.2330              |
| <i>Florisphaera profunda</i>      | 22.0                          | 40.78                  | 0.1794              |
| <i>Emiliana huxleyi</i>           | 31.0                          | 6.46                   | 0.0400              |
| <i>Umbellosphaera irregularis</i> | 15.3                          | 11.75                  | 0.0358              |
| <i>Umbilicosphaera sibogae</i>    | 30.0                          | 4.05                   | 0.0243              |

Table 2 Predominant species abundance in the eastern equatorial Indian Ocean during spring intermonsoon period of 2012.

| <b>Dominant coccoliths</b>        | Min, Max (Mean)<br>Units (coccoliths ml <sup>-1</sup> ) |
|-----------------------------------|---------------------------------------------------------|
| <i>Gephyrocapsa oceanica</i>      | -, 154.955 (16.260)                                     |
| <i>Emiliana huxleyi</i>           | -, 23.706 (1.814)                                       |
| <i>Umbilicosphaera sibogae</i>    | -, 29.04 (1.418)                                        |
| <i>Helicosphaera carteri</i>      | -, 7.829 (0.793)                                        |
| <i>Helicosphaera hyalina</i>      | -, 10.307 (0.685)                                       |
| <b>Dominant coccospheres</b>      | Min, Max (Mean)<br>Units (cells ml <sup>-1</sup> )      |
| <i>Gephyrocapsa oceanica</i>      | -, 24.805 (2.458)                                       |
| <i>Florisphaera profunda</i>      | -, 53.845 (3.828)                                       |
| <i>Emiliana huxleyi</i>           | -, 20.167 (0.606)                                       |
| <i>Umbellosphaera irregularis</i> | -, 24.675 (1.103)                                       |
| <i>Umbilicosphaera sibogae</i>    | -, 3.609 (0.381)                                        |



Table 3 Global test by ANOSIM analysis in coccosphere species matrix.

| Pairwise Tests |             |                      |                       |                     |                        |
|----------------|-------------|----------------------|-----------------------|---------------------|------------------------|
| Groups         | R Statistic | Significance level % | Possible permutations | Actual permutations | Number $\geq$ observed |
| a, b           | 0.687       | 0.1                  | 1961256               | 999                 | 0                      |
| a, c           | 0.997       | 0.1                  | 38760                 | 999                 | 0                      |
| a, d           | 0.999       | 0.8                  | 120                   | 120                 | 1                      |
| b, c           | 0.862       | 0.2                  | 8008                  | 999                 | 1                      |
| b, d           | 0.989       | 1.5                  | 66                    | 66                  | 1                      |
| c, d           | 0.906       | 3.6                  | 28                    | 28                  | 1                      |

Table 4 Dominant coccosphere species and their contribution to each group revealed by means of SIMPER analysis.

| Group        | Average similarity | Dominant species contribution                                                                                                                                                                |
|--------------|--------------------|----------------------------------------------------------------------------------------------------------------------------------------------------------------------------------------------|
| Coccospheres |                    |                                                                                                                                                                                              |
| d            | 40.49              | <i>Gephyrocapsa oceanica</i> (99.52)                                                                                                                                                         |
| b            | 53.78              | <i>Gephyrocapsa oceanica</i> (40.38); <i>Emiliana huxleyi</i> (28.62); <i>Oolithotus fragilis</i> (11.63); <i>Florisphaera profunda</i> (7.97); <i>Helicosphaera carteri</i> (4.18)          |
| c            | 59.53              | <i>Umbellosphaera irregularis</i> (43.67); <i>Umbilicosphaera sibogae</i> (27.06); <i>Gephyrocapsa oceanica</i> (10.28); <i>Helicosphaera hyaline</i> (8.07); <i>Emiliana huxleyi</i> (5.36) |
| a            | 61.21              | <i>Florisphaera profunda</i> (61.89); <i>Gephyrocapsa oceanica</i> (22.20); <i>Algirosphaera robusta</i> (7.02)                                                                              |

Table 5 The statistical values by PCA analysis in coccosphere species matrix.

| Eigenvectors |              |              |        |        |        |
|--------------|--------------|--------------|--------|--------|--------|
| Variable     | PC1          | PC2          | PC3    | PC4    | PC5    |
| Temperature  | -0.423       | <b>0.468</b> | 0.019  | 0.302  | -0.34  |
| Salinity     | <b>0.468</b> | -0.102       | 0.137  | 0.311  | -0.787 |
| Density      | <b>0.459</b> | -0.455       | 0.084  | -0.016 | 0.163  |
| Chla         | 0.42         | <b>0.488</b> | 0.089  | 0.241  | 0.305  |
| Micro        | 0.307        | <b>0.413</b> | -0.284 | -0.755 | -0.251 |
| Nano         | 0.202        | <b>0.348</b> | 0.682  | -0.007 | 0.199  |
| Pico         | <b>0.282</b> | 0.186        | -0.648 | 0.429  | 0.206  |

## Legends:

- Fig. 1. Study area in the eastern equatorial Indian Ocean showing the station locations.
- Fig. 2. Sea surface temperature (°C) and salinity in the surveyed area (left); Temperature-salinity (T-S) diagram in the surveyed area, the blue solid line showed an inversed-L-shape of the hydrologic data (right).
- Fig. 3. The abundance of dominant coccolithophore species in the eastern equatorial Indian Ocean. (units: coccoliths  $l^{-1}$ , cells  $l^{-1}$ )
- Fig. 4. The surface distribution of dominant coccoliths (units: coccoliths  $l^{-1}$ ) in the surveyed area.
- Fig. 5. The surface distribution of dominant coccospheres (units: cells  $l^{-1}$ ) in the surveyed area.
- Fig. 6. Dominant coccolith distributions (units: coccoliths  $l^{-1}$ ) along section A of the surveyed area.
- Fig. 7. Dominant coccosphere distributions (units: cells  $l^{-1}$ ) along section A of the surveyed area.
- Fig. 8. Dominant coccolith distributions (units: coccoliths  $l^{-1}$ ) along section B of the surveyed area.
- Fig. 9. Dominant coccosphere distributions (units: cells  $l^{-1}$ ) along section B of the surveyed area.
- Fig. 10. Vertical distributions of dominant coccoliths (units: coccoliths  $l^{-1}$ ) in the surveyed area. (a) Sum; (b) *Gephyrocapsa oceanica*; (c) *Emiliana huxleyi*; (d) *Umbilicosphaera sibogae*; (e) *Helicosphaera carteri*; (f) *Helicosphaera hyaline*
- Fig. 11. Vertical distributions of dominant coccospheres (units: cells  $l^{-1}$ ) in the surveyed area. (a) Sum; (b) *Gephyrocapsa oceanica*; (c) *Florisphaera profunda*; (d) *Emiliana huxleyi*; (e) *Umbellosphaera irregularis*; (f) *Umbilicosphaera sibogae*
- Fig. 12. The ratio of coccosphere to free coccolith in upper ocean column in the eastern equatorial Indian Ocean. (a): section A; (b): section B; (c): section C; (d): section D
- Fig. 13. The horizontal distributions of PIC, POC (units:  $\mu gCaCO_3 l^{-1}$ ,  $\mu gC l^{-1}$ ), and rain ratio in the surveyed area. (a)~(c): of surface layer; (d)~(f): of vertically integrated.
- Fig. 14 Stations clustered by Bray-Curtis rank similarities and group average linkage (upper); MDS ordination and its bubble plots for six dominant coccosphere species (below).
- Fig. 15. Surface distributions of biodiversity index of coccolithophore in the surveyed area.
- Fig. 16. Box and whisker diagrams of biodiversity index of coccolithophore in the surveyed area.
- Fig. 17. Scatter plots of coccolith distribution under T-S properties in the surveyed area.
- Fig. 18. Scatter plots of coccosphere distribution under T-S properties in the surveyed area.
- Fig. 19. Ordination biplot based on PCA analysis among environmental variables of the surveyed area. Notes: group partitions here referred to fig. 13; Chla: chlorophyll *a*, Micro: micro-sized Chla, Nano: nano-sized Chla, Pico: Pico-sized Chla, G.o: *Gephyrocapsa oceanica*, F.p: *Florisphaera profunda*, E.h: *Emiliana huxleyi*, U.i: *Umbellosphaera irregularis*, U.s: *Umbilicosphaera sibogae*, A.r: *Algirosphaera robusta*.

PlateI-VI.

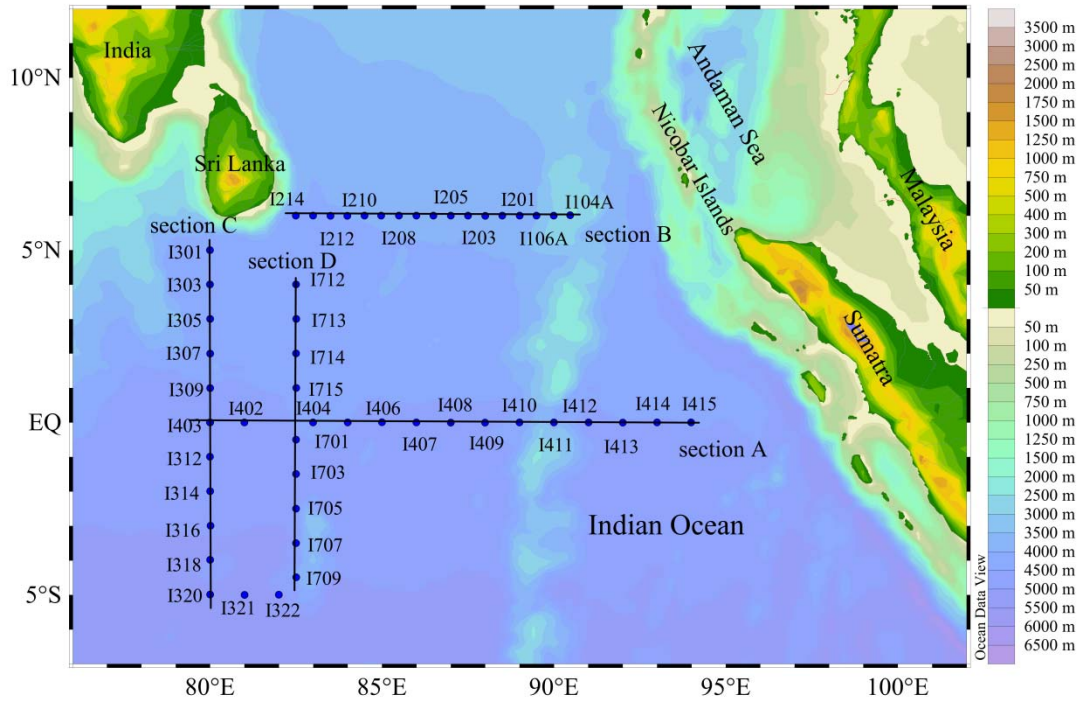

Fig. 1. Study area in the eastern equatorial Indian Ocean showing the station locations.

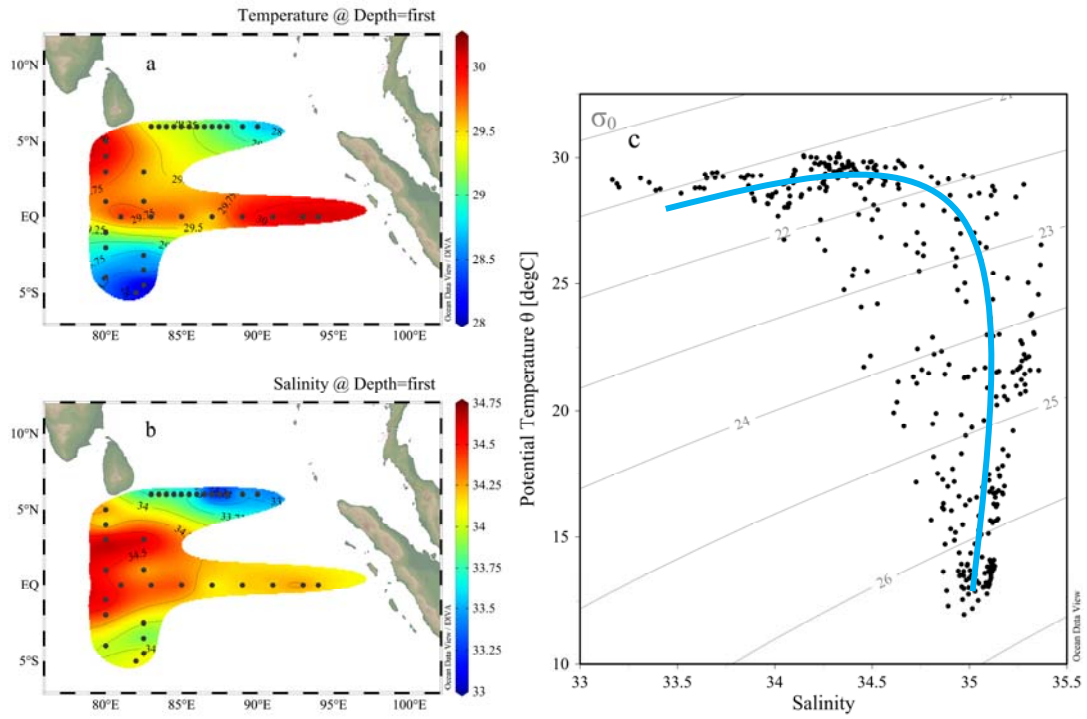

Fig. 2. Sea surface temperature ( $^{\circ}\text{C}$ ) and salinity in the surveyed area (left); Temperature-salinity (T-S) diagram in the surveyed area, the blue solid line shows an the inversed-L-shape of the hydrologic data (right).

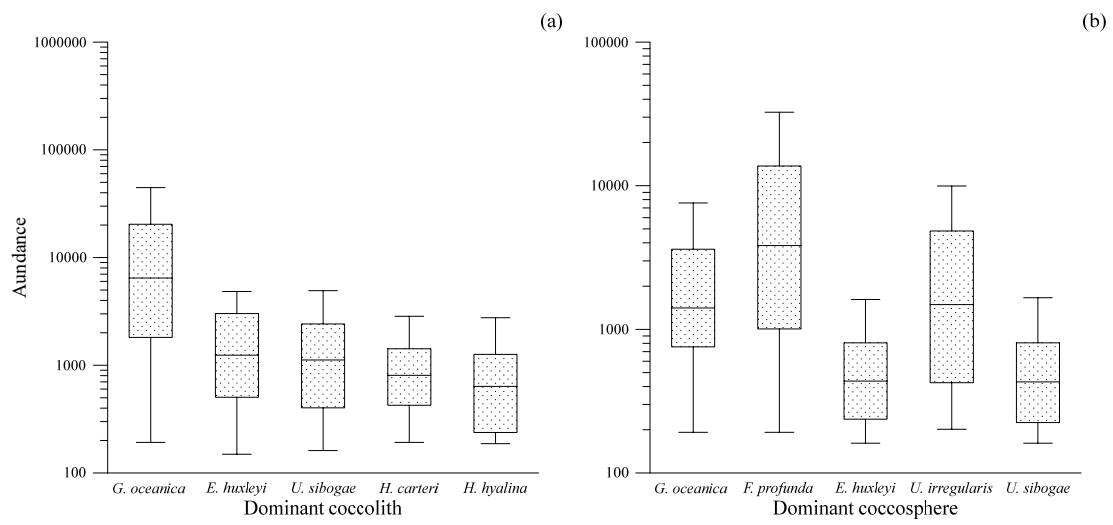

Fig. 3. The abundance of dominant coccolithophore species in the eastern equatorial Indian Ocean.  
(units: coccoliths  $l^{-1}$ , cells  $l^{-1}$ )

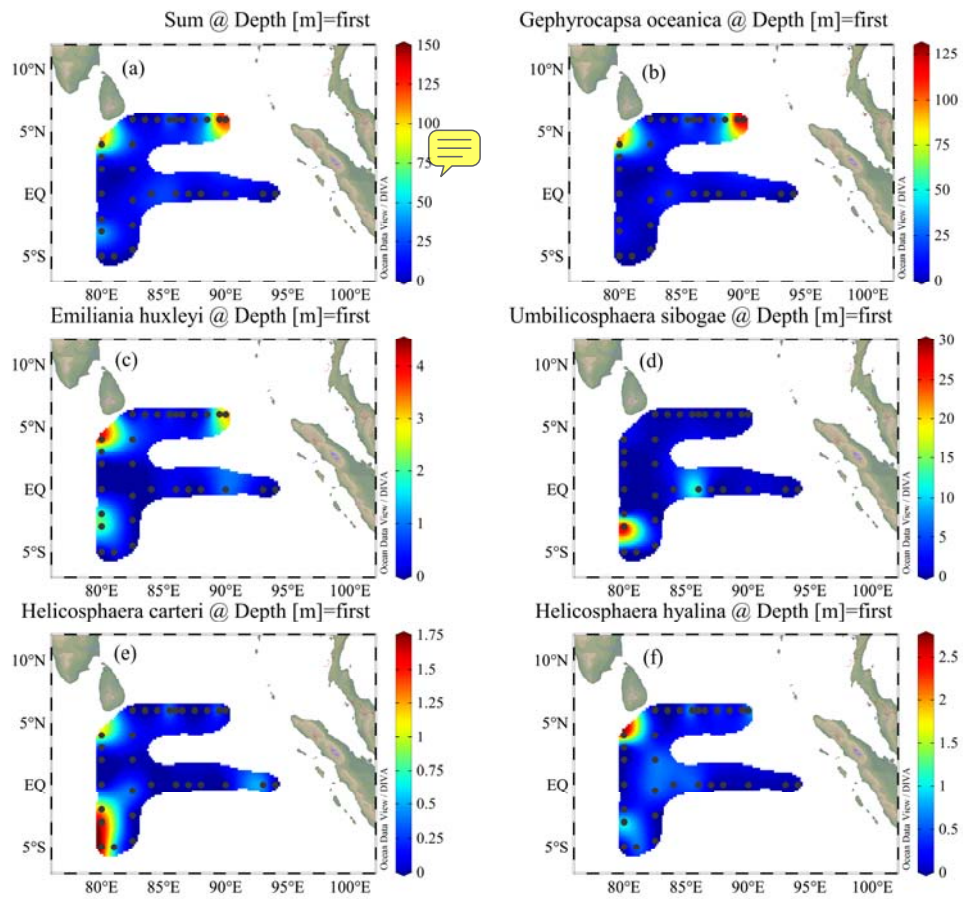

Fig. 4. The surface distribution of dominant coccoliths (units: coccoliths l<sup>-1</sup>) in the surveyed area.



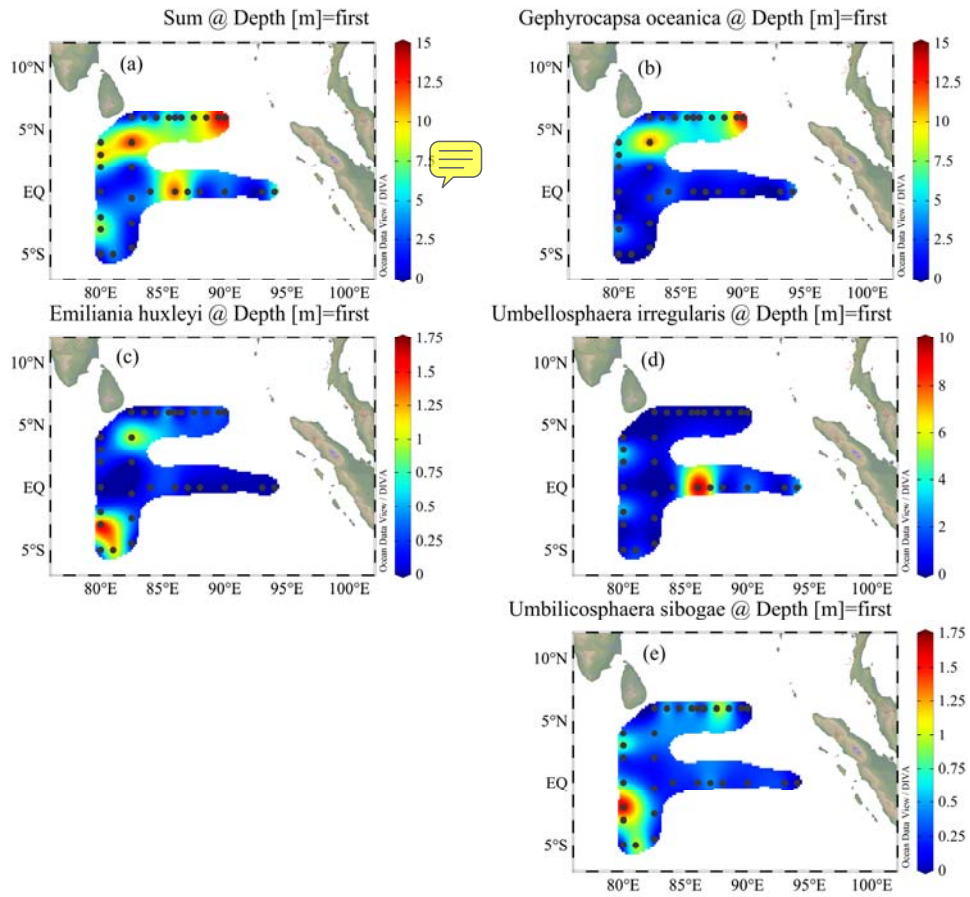

Fig. 5. The surface distribution of dominant coccospheres (units: cells  $l^{-1}$ ) in the surveyed area.

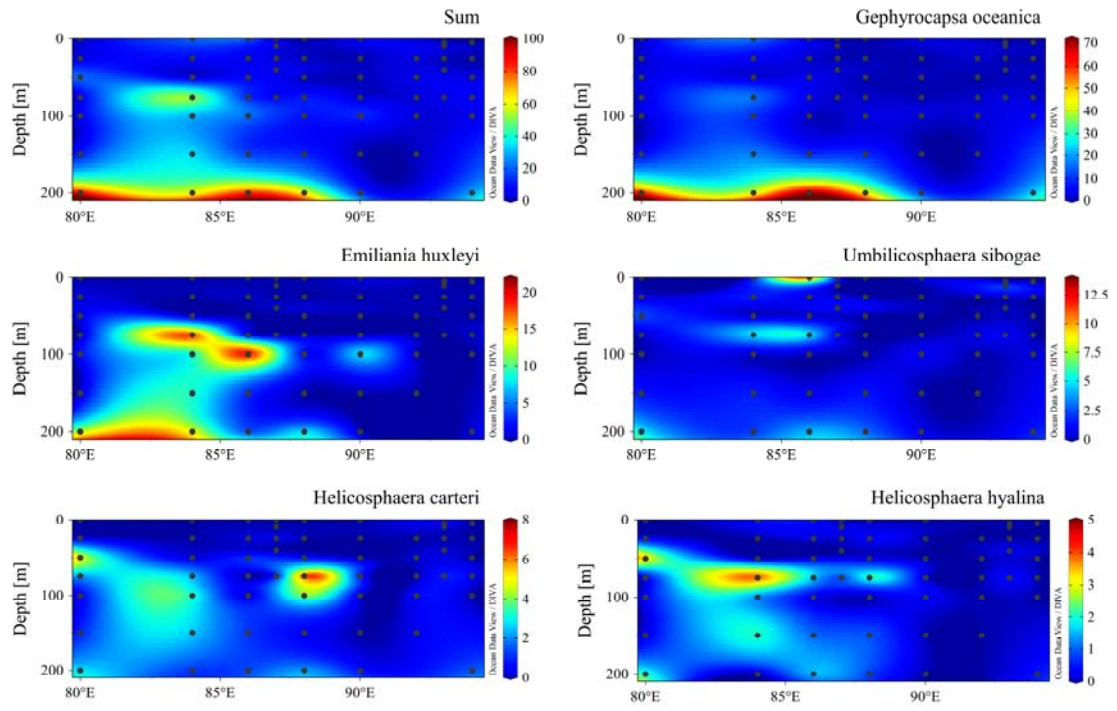

Fig. 6. Dominant coccolith distributions (units: coccoliths l<sup>-1</sup>) along section A of the surveyed area.

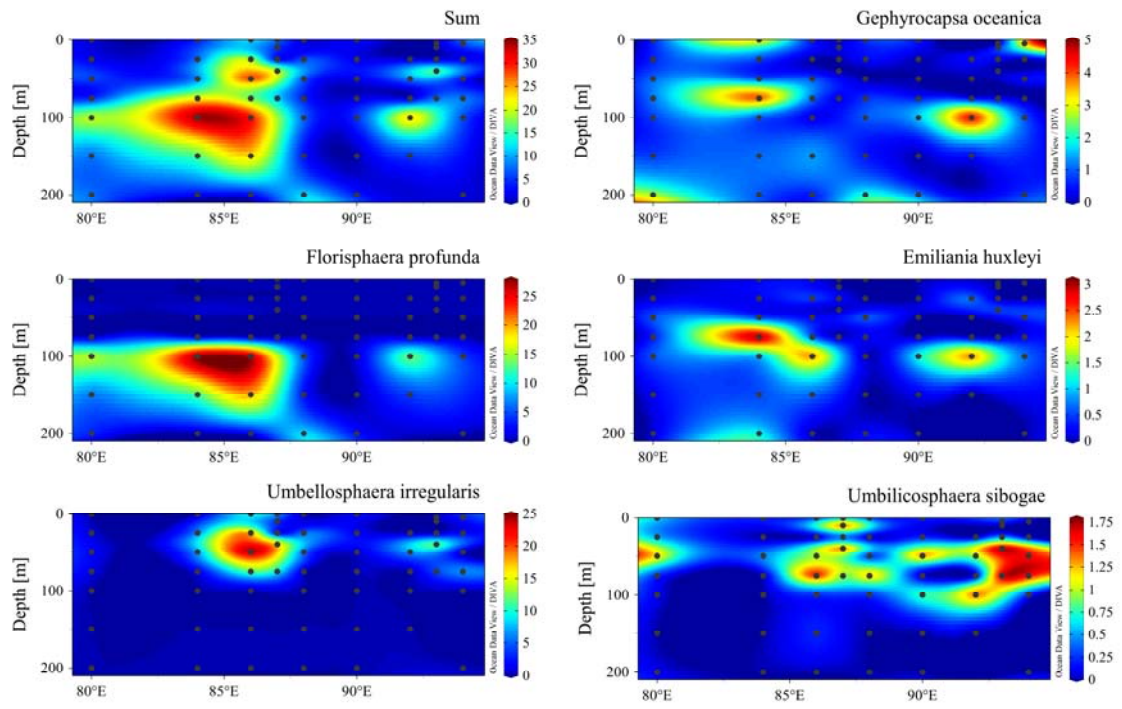

Fig. 7. Dominant coccosphere distributions (units: cells l<sup>-1</sup>) along section A of the surveyed area.

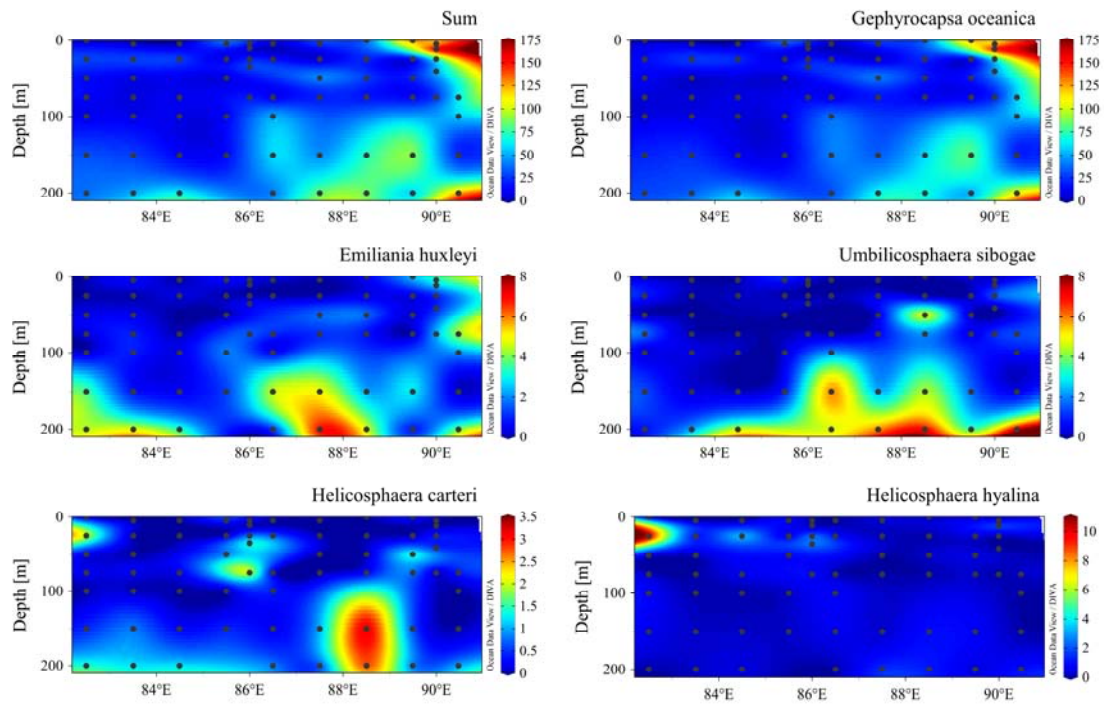

Fig. 8. Dominant coccolith distributions (units: coccoliths l<sup>-1</sup>) along section B of the surveyed area.

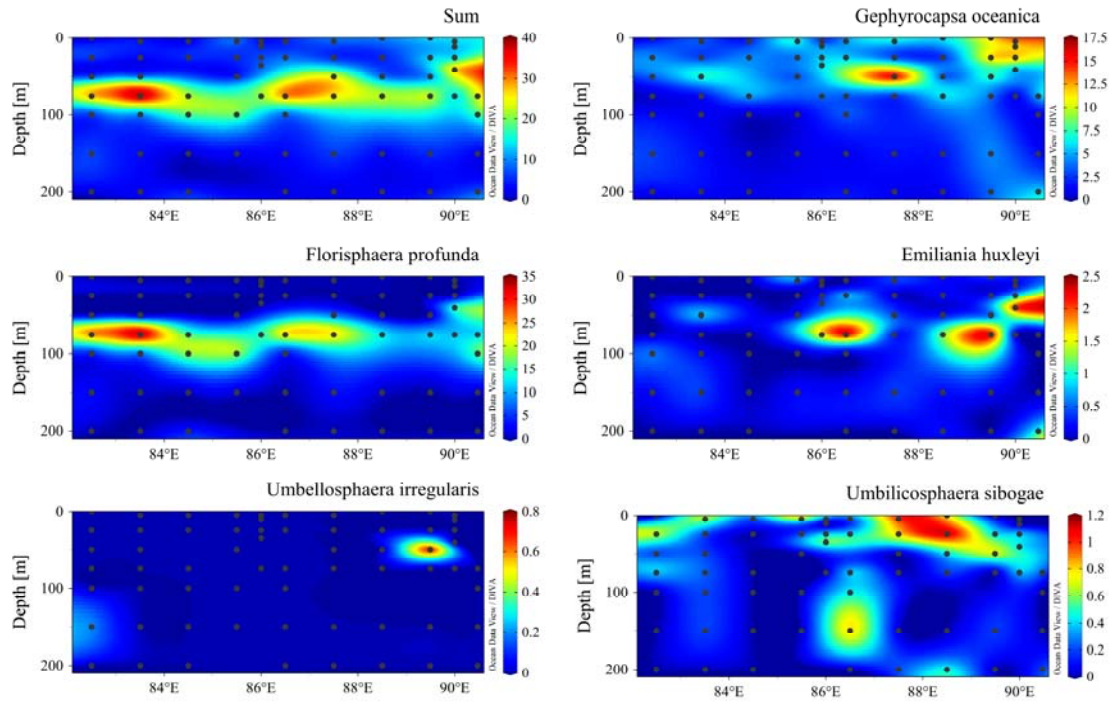

Fig. 9. Dominant coccosphere distributions (units: cells  $l^{-1}$ ) along section B of the surveyed area.

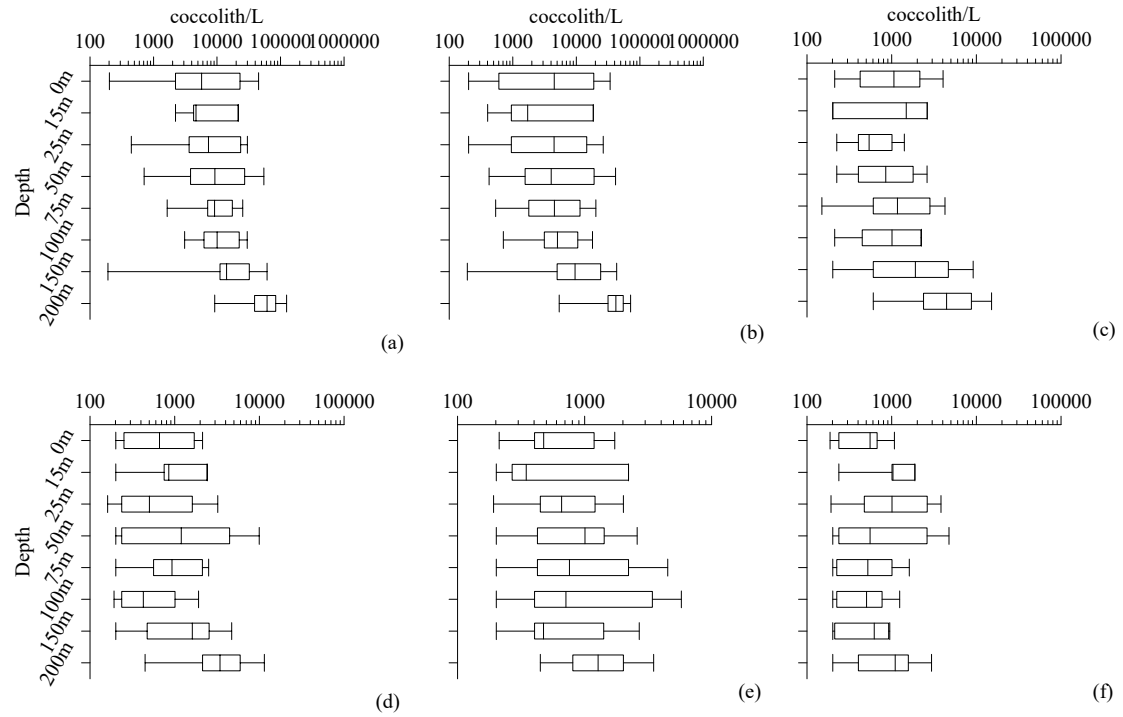

Fig. 10. Vertical distributions of dominant coccoliths (units: coccoliths  $l^{-1}$ ) in the surveyed area. (a) Sum; (b) *Gephyrocapsa oceanica*; (c) *Emiliana huxleyi*; (d) *Umbilicosphaera sibogae*; (e) *Helicosphaera carteri*; (f) *Helicosphaera hyaline*

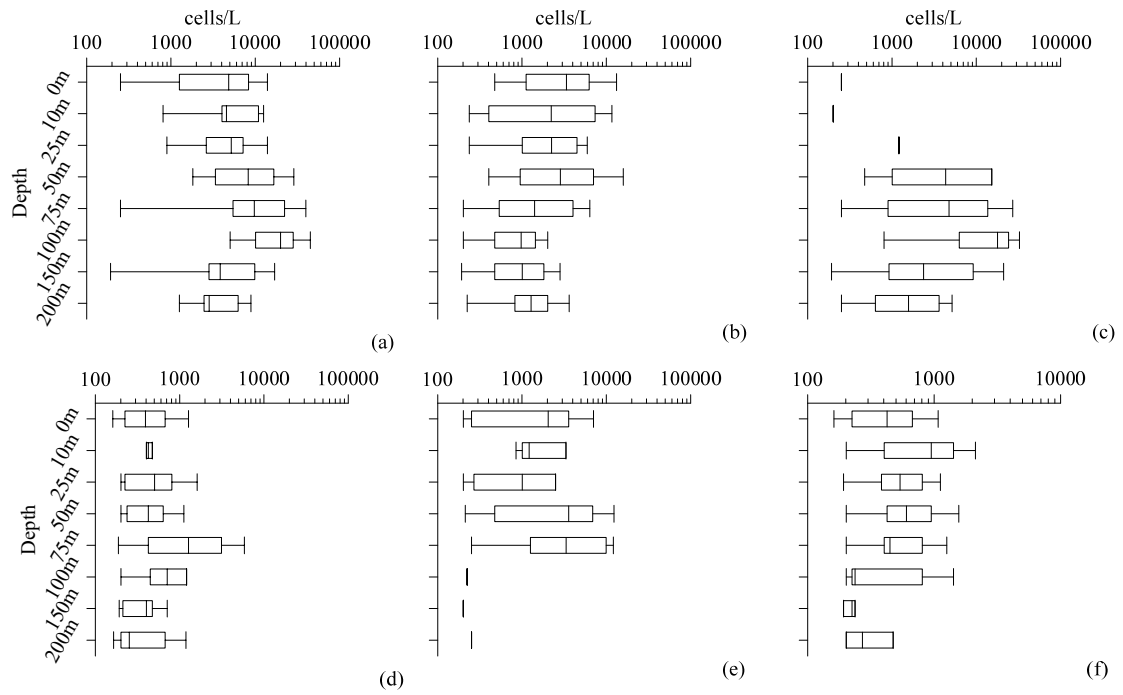

Fig. 11. Vertical distributions of dominant coccospheres (units: cells l<sup>-1</sup>) in the surveyed area. (a) Sum; (b) *Gephyrocapsa oceanica*; (c) *Florisphaera profunda*; (d) *Emiliana huxleyi*; (e) *Umbellosphaera irregularis*; (f) *Umbilicosphaera sibogae*

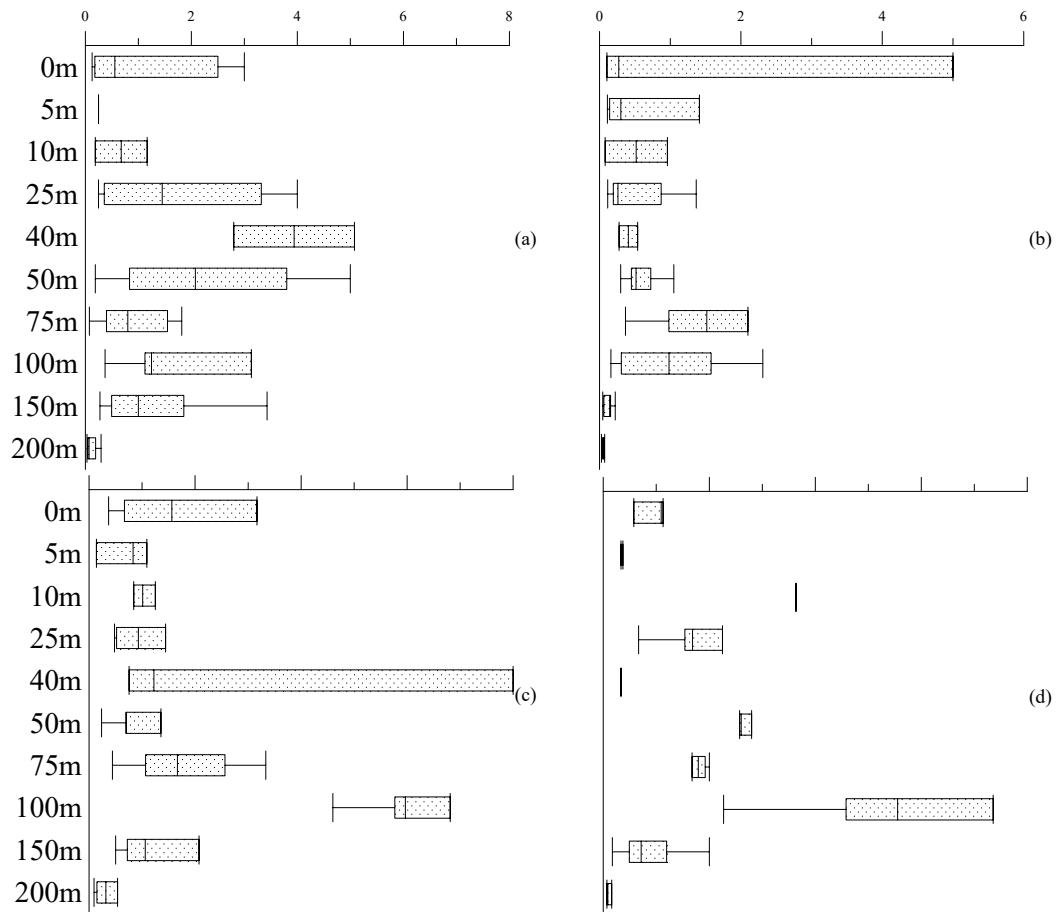

Fig. 12. The ratio of coccosphere to free coccolith in upper ocean column in the surveyed area. (a): section A; (b): section B; (c): section C; (d): section D



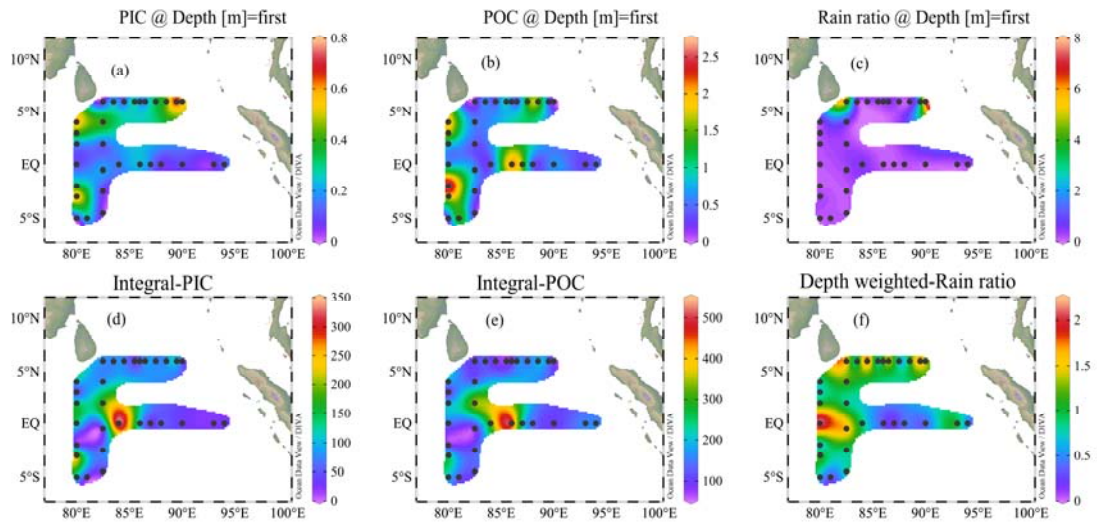

Fig. 13. The horizontal distributions of PIC, POC (units:  $\mu\text{gC l}^{-1}$ ), and rain ratio in the surveyed area. (a)~(c): of surface layer; (d)~(f): of vertically integrated.

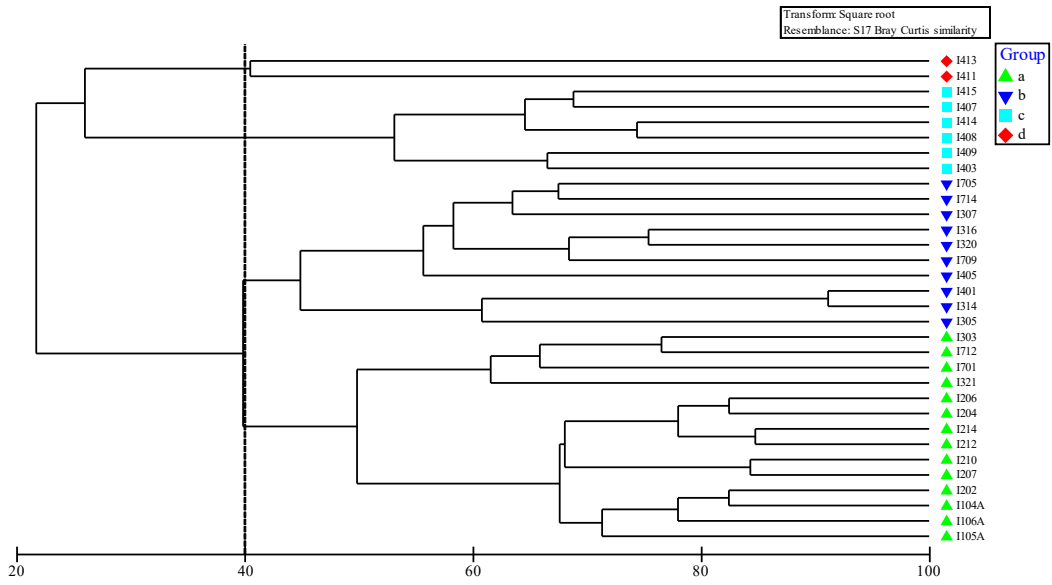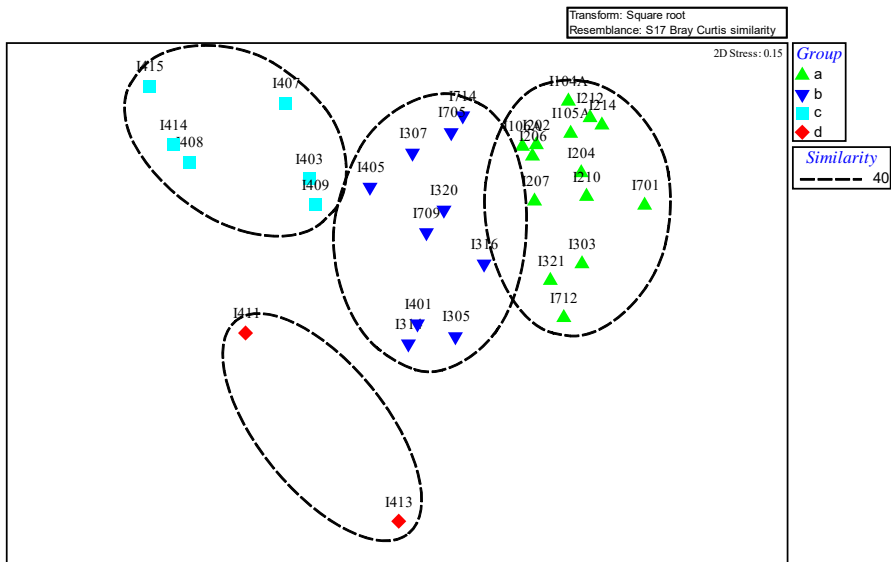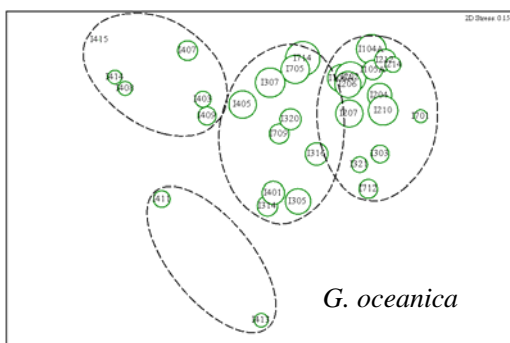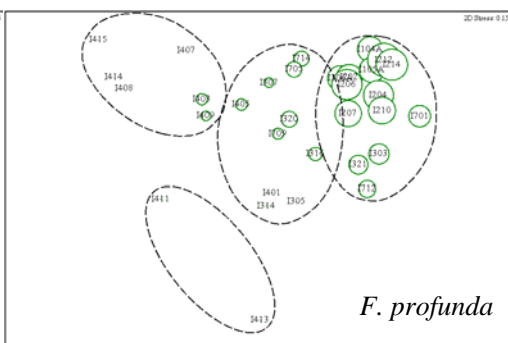

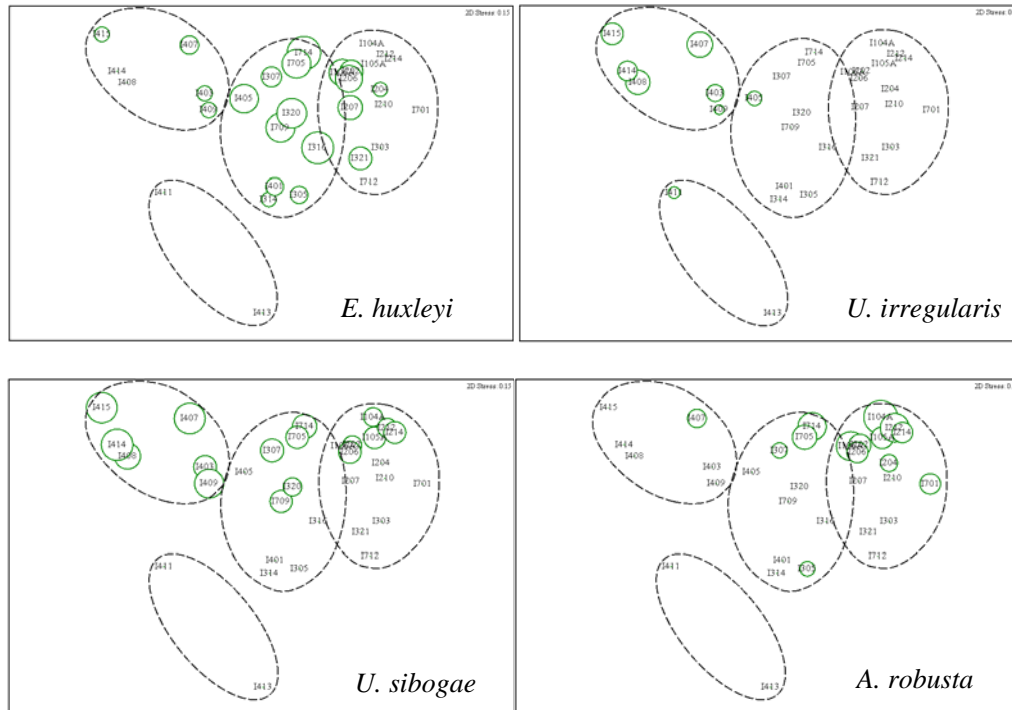

Fig. 14. Stations clustered by Bray-Curtis rank similarities and group average linkage (upper); MDS ordination and its bubble plots for six dominant coccosphere species (below).

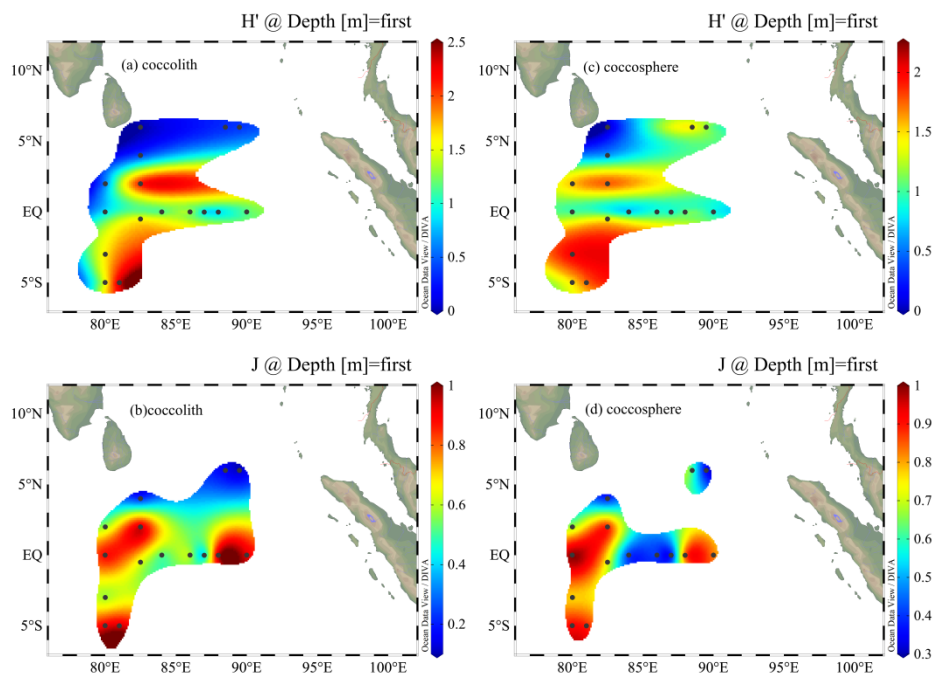

Fig. 15. Surface distributions of biodiversity index of coccolithophore in the surveyed area.

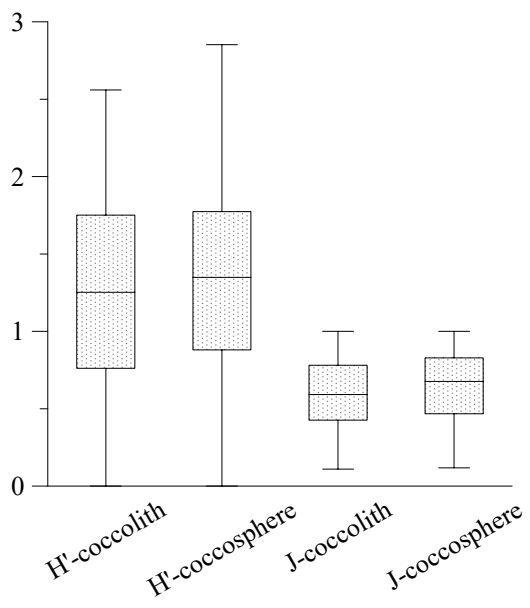

Fig. 16. Box and whisker diagrams of biodiversity index of coccolithophore in the surveyed area.

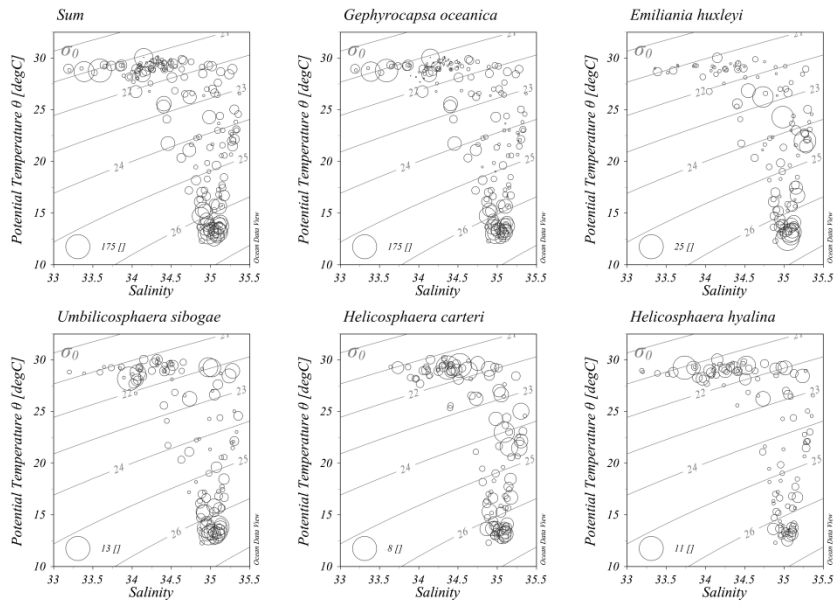

Fig. 17. Scatter plots of coccolith distribution under T-S properties in the surveyed area.

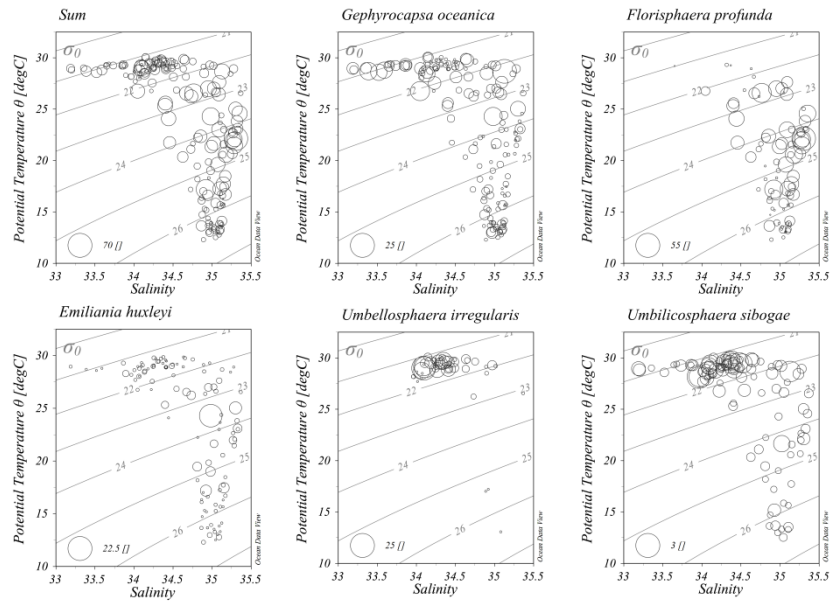

Fig. 18. Scatter plots of coccophere distribution under T-S properties in the surveyed area.

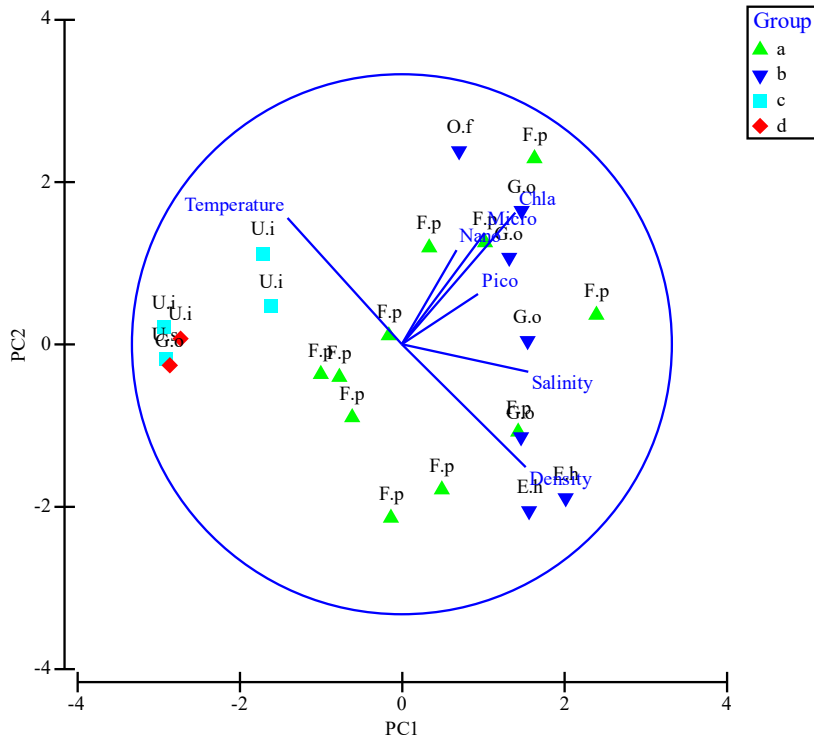

Fig. 19. Ordination biplot based on PCA analysis among environmental variables of the surveyed area. Note: group partitions here refer to fig. 13; Chla: chlorophyll, Micro: micro-sized Chla, Nano: nano-sized Chla, Pico: Pico-sized Chla, G.o: *Gephyrocapsa oceanica*, F.p: *Florisphaera profunda*, E.h: *Emiliana huxleyi*, U.i: *Umbellosphaera irregularis*, U.s: *Umbilicosphaera sibogae*, A.r: *Algirosphaera robusta*.



Plate I. Noëlaerhabdaceae: *Emiliana* & *Gephyrocapsa*

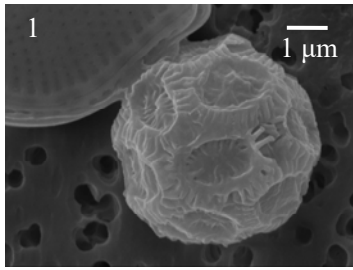

*E. huxleyi* type A overcalcified

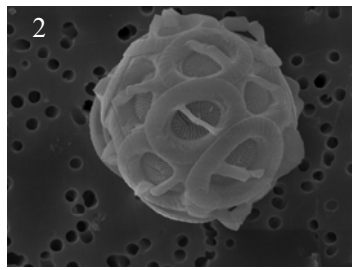

*G. oceanica*

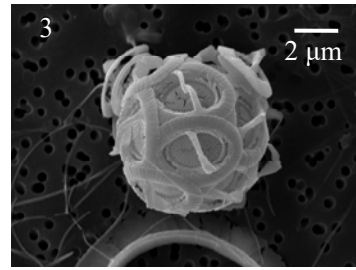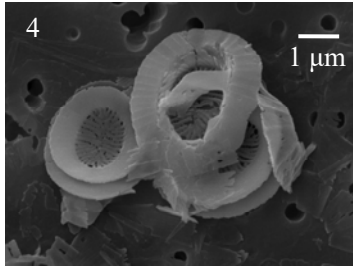

*G. oceanica* coccolith

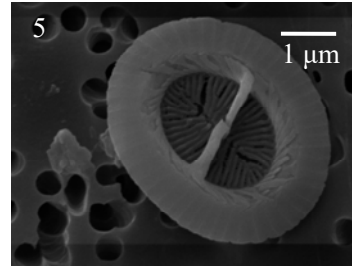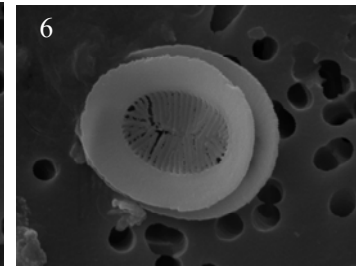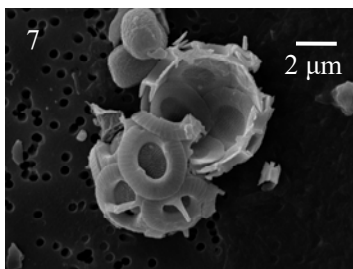

*G. oceanica* collapsed

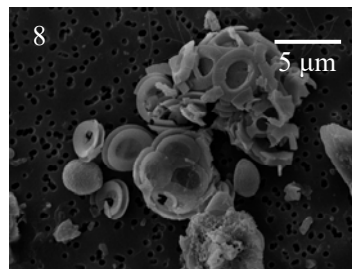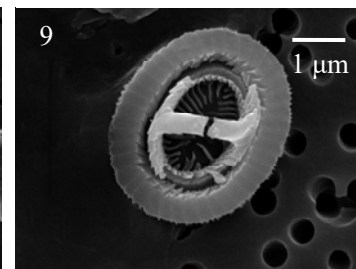

Plate II . Umbellosphaeraceae: *Umbellosphaera*

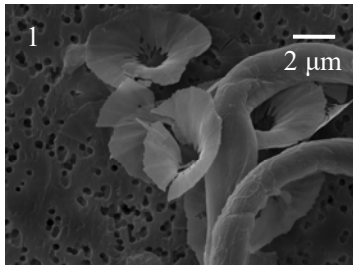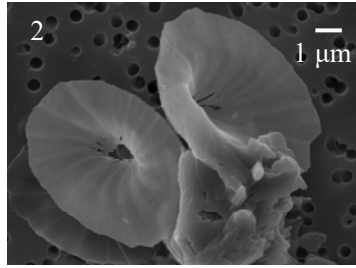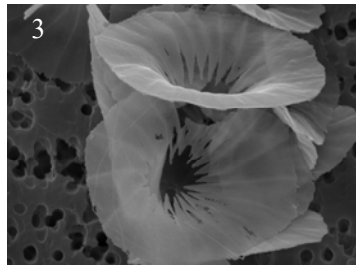

*U. irregularis*

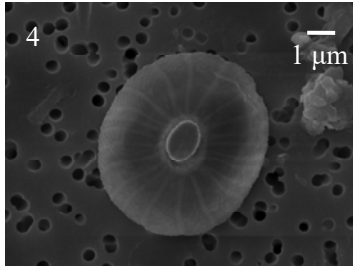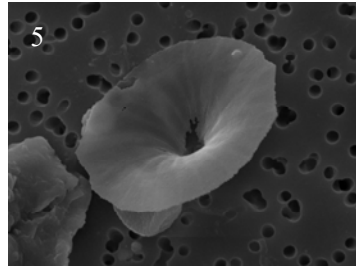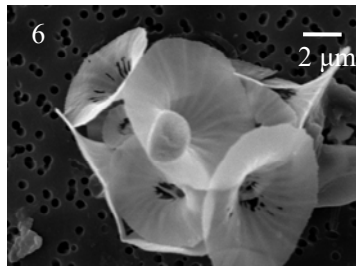

*U. irregularis*

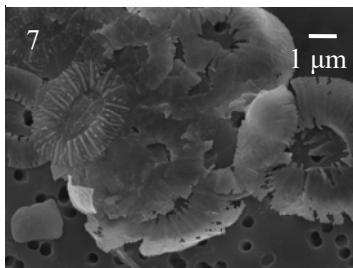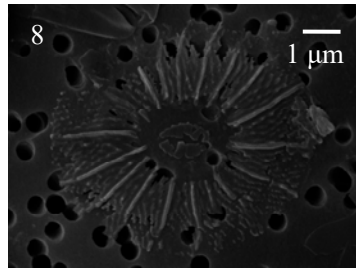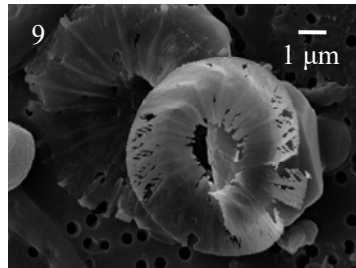

*U. tenuis*

*U. tenuis* type I

Plate III. Calcidisceae: *Umblicosphaera* & *Calcidiscus*

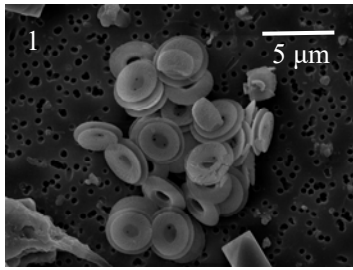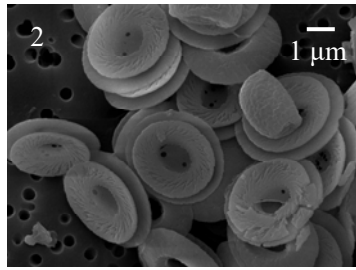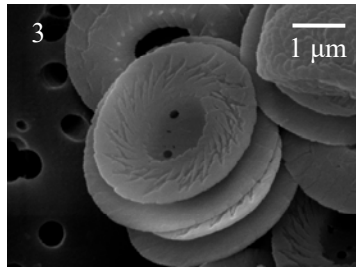

*U. hulburtiana*

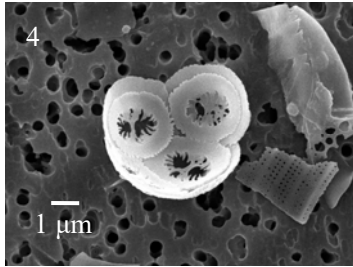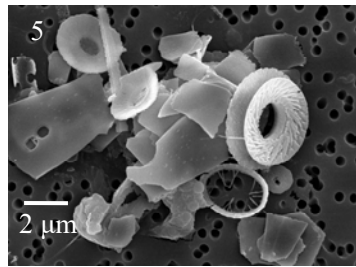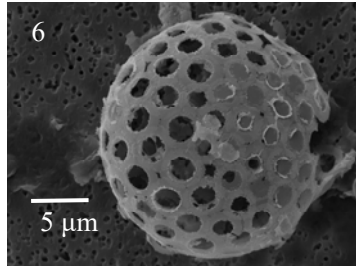

*U. foliosa*

*U. sibogae*

*U. sp. 1*

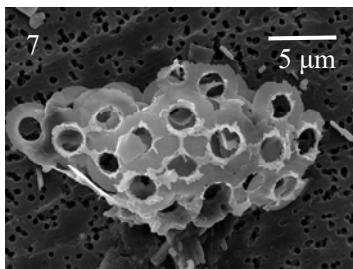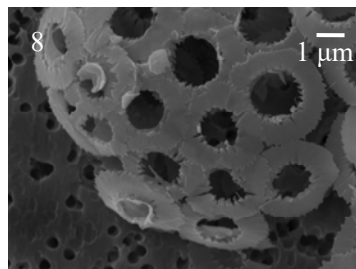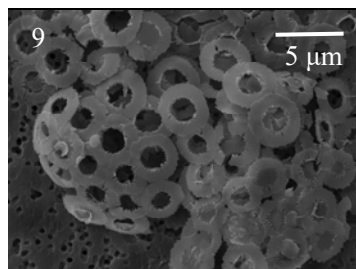

*U. sp. 1* cell collapsed

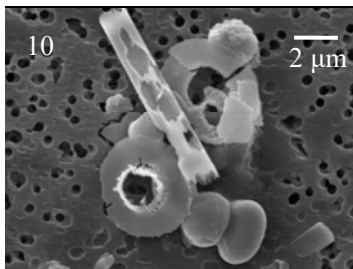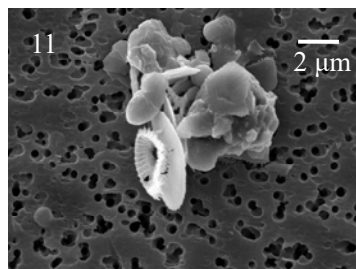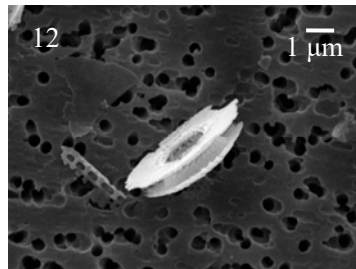

*U. sp. 1* coccolith detached

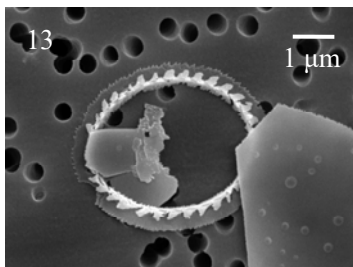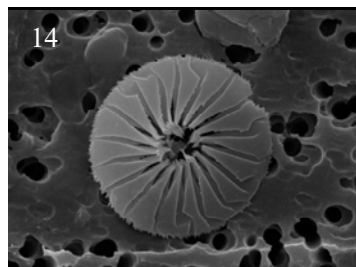

*U. sp. 2*

*C. leptoporus*

Plate IV. *Reticulofenestra* & *Ceratolithus* & *Pontosphaera* & *Discosphaera*

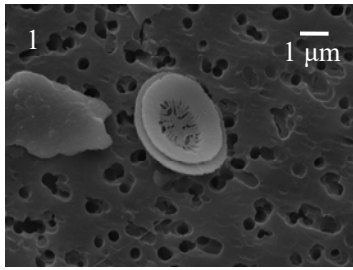

*Reticulofenestra* sp. 1

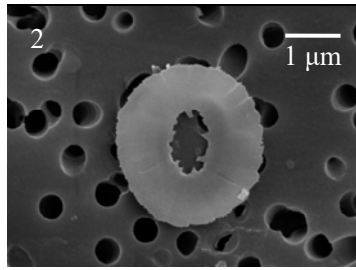

*Reticulofenestra* sp. 2

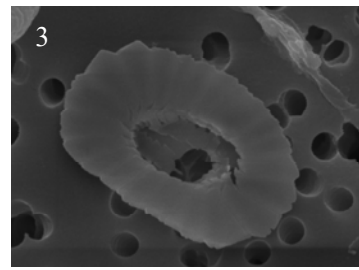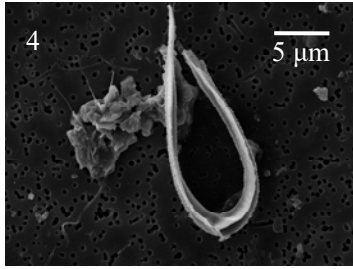

*C. cristatus* CER *telesmus* type

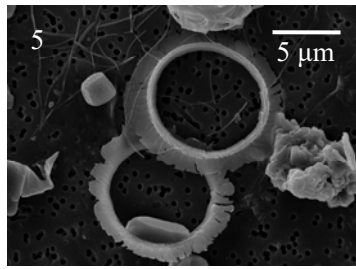

*C. cristatus* HET coccolithomorpha type

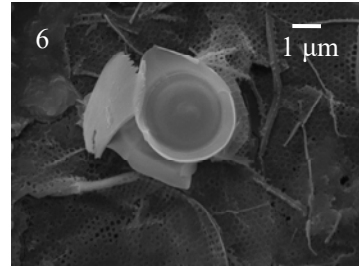

*P. syracusana*

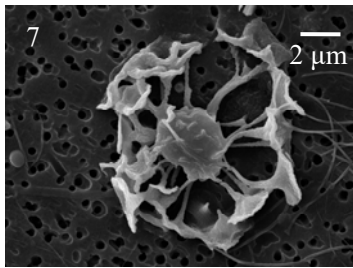

*D. tubifera*

Plate V. Syracosphaeraceae: *Syracosphaera*

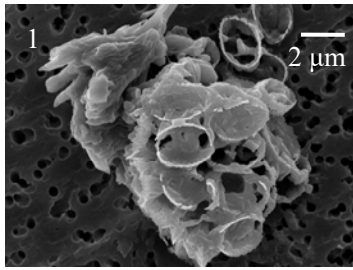

Cell disintegrated

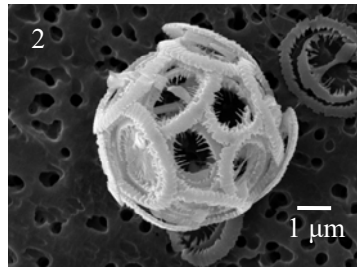

*S. histrica*

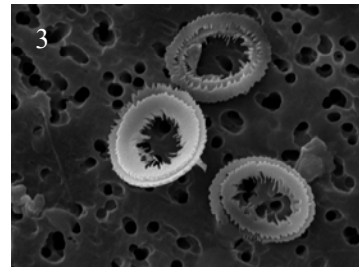

Plate VI. Mixed group

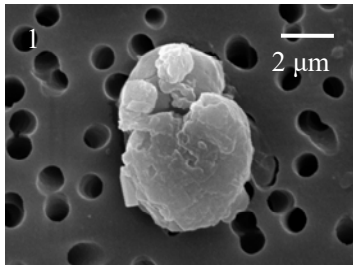

Coccolith-missed coccosphere

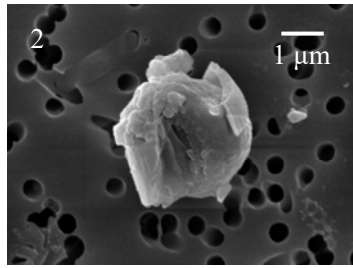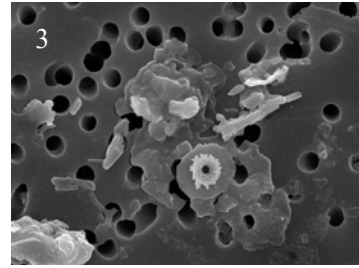

Cell collapsed

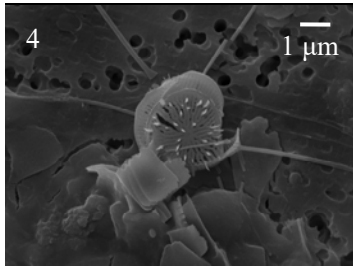

Unknown sp. 1

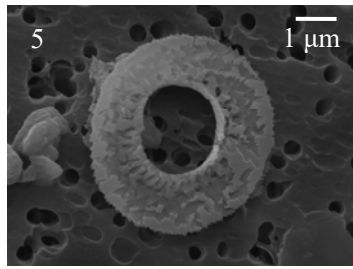

Unknown sp. 2

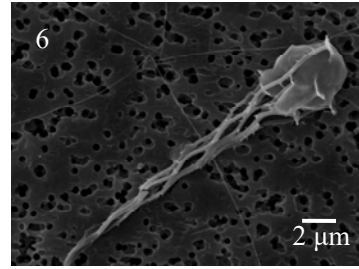

Unknown sp. 3

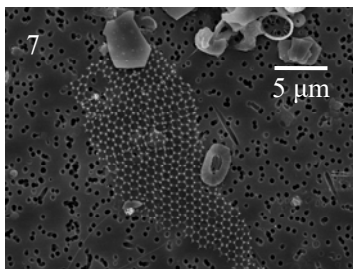

Unknown sp. 3

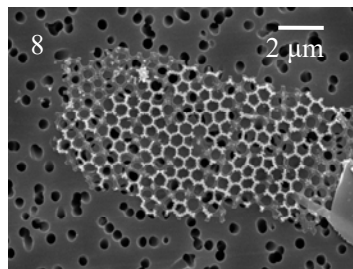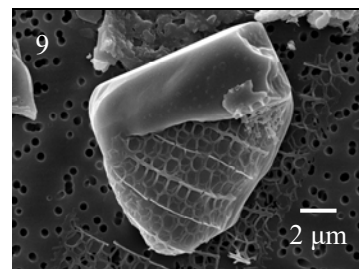

Unknown sp. 4

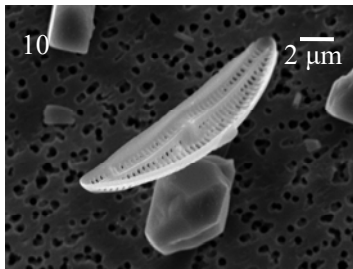

Unknown sp. 4

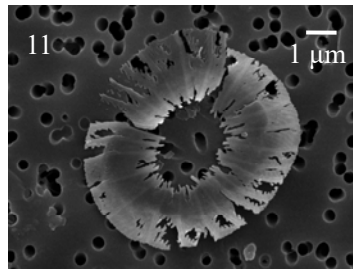

Coccolith deformed
